# Supplementary material for: Oral manifestations in young adults infected with COVID-19 and impact of smoking: a multi-country cross-sectional study
Source: PeerJ. 2022 Jul 15;10:e13555. doi: 10.7717/peerj.13555 (PMC9291069; doi:10.7717/peerj.13555)
Supplement: Supplemental Information 2 [file peerj-10-13555-s002.xlsx]

## Sheet: Supplemental_raw data
Age	Sex	Country	Do you have medical problems	Infected with COVID	Suspected of COVID infection but not tested	Do electronic cigarettes cause you any of the following conditions-non	Do electronic cigarettes cause you any of the following conditions-teeth discoloration	Do electronic cigarettes cause you any of the following conditions-caries	Do electronic cigarettes cause you any of the following conditions-gum inflamation	Do electronic cigarettes cause you any of the following conditions-White lesion	Do electronic cigarettes cause you any of the following conditions-Hairy tongue	Do electronic cigarettes cause you any of the following conditions-Taste alteration	Do electronic cigarettes cause you any of the following conditions-Vomiting /Nause	Do electronic cigarettes cause you any of the following conditions-Wound burns	Do electronic cigarettes cause you any of the following conditions-Mouth dryness	Do electronic cigarettes cause you any of the following conditions-Mouth airway irritatio	Do electronic cigarettes cause you any of the following conditions-Cancer	Smoking
1	1	183	1	1	2	0	0	0	0	0	1	0	0	1	0	0	0	1
1	1	183	1	1	2	0	0	0	0	1	0	1	0	0	0	1	0	2
1	1	183	2	1	2	0	0	0	0	1	0	0	0	1	0	0	0	2
1	1	151	2	1	2	1	0	0	0	0	0	0	0	0	0	0	0	2
1	1	191	2	1	1	0	1	0	1	1	1	1	0	0	1	0	1	2
1	1	183	1	1	1	0	0	0	0	0	0	0	0	0	1	1	0	2
1	1	169	2	1	1	0	0	0	0	0	1	1	0	0	1	1	0	2
1	1	169	2	1	2	0	1	0	0	0	0	0	0	0	0	1	0	2
1	1	53	2	1	1	1	0	0	0	0	0	0	0	0	0	0	0	2
1	1	169	2	1	1	1	0	0	0	0	0	0	0	0	0	0	0	2
1	1	169	2	1	1	1	0	0	0	0	0	0	0	0	0	0	0	2
1	1	169	1	1	2	1	0	0	0	0	0	0	0	0	0	0	0	2
1	1	169	2	1	2	0	1	0	1	1	1	0	0	0	0	0	0	1
1	1	169	2	1	1	1	0	0	0	0	0	0	0	0	0	0	0	1
1	1	169	2	1	1	0	0	1	0	0	0	0	0	0	0	1	0	1
1	1	169	2	1	1	1	0	0	0	0	0	0	0	0	0	0	0	2
1	1	169	2	1	1	0	1	0	0	0	0	0	0	0	0	0	0	2
1	1	151	2	1	2	0	0	1	0	0	0	0	0	0	1	0	0	1
1	1	169	2	1	1	0	1	0	0	0	1	1	0	0	1	1	0	2
1	1	151	2	1	1	0	0	1	0	0	0	0	0	0	0	0	0	2
1	1	169	2	1	1	0	1	1	1	1	1	1	1	1	1	1	1	2
1	1	129	2	1	1	0	0	1	0	0	0	0	0	0	0	0	0	2
1	1	169	2	1	1	0	1	0	0	0	0	0	0	0	0	0	0	2
1	1	169	2	1	1	1	0	0	0	0	0	0	0	0	0	0	0	2
1	1	169	2	1	1	1	0	0	0	0	0	0	0	0	0	0	0	2
1	1	81	2	1	1	0	1	1	1	0	0	0	0	0	0	0	0	2
1	1	151	2	1	1	0	0	0	0	0	0	0	0	0	1	1	0	1
1	1	151	2	1	2	0	0	0	0	0	0	1	0	0	0	1	0	1
1	1	164	2	1	2	1	0	0	0	0	0	0	0	0	0	0	0	2
1	1	151	2	1	2	1	0	0	0	0	0	0	0	0	0	0	0	2
1	1	177	2	1	2	1	0	0	0	0	0	0	0	0	0	0	0	2
1	1	169	2	1	1	1	0	0	0	0	0	0	0	0	0	0	0	2
1	1	169	2	1	2	1	0	0	0	0	0	0	0	0	0	0	0	2
1	1	93	2	1	2	1	0	0	0	0	0	0	0	0	0	0	0	2
1	1	151	2	1	2	0	1	0	0	0	0	0	0	0	0	0	0	1
1	1	169	2	1	1	0	0	0	0	0	0	1	0	0	0	0	0	2
1	1	169	2	1	1	0	1	0	0	0	0	0	0	0	0	1	0	1
1	1	169	2	1	2	1	0	0	0	0	0	0	0	0	0	0	0	2
1	1	169	2	1	1	0	0	1	0	0	0	1	0	0	0	1	0	2
1	1	169	1	1	2	1	0	0	0	0	0	0	0	0	0	0	0	2
1	1	169	2	1	1	1	0	0	0	0	0	0	0	0	0	0	0	2
1	1	169	2	1	1	1	0	0	0	0	0	0	0	0	0	0	0	2
1	1	169	2	1	1	0	1	1	0	0	0	0	0	0	0	0	0	1
1	1	183	2	1	1	0	1	0	0	0	0	1	0	0	1	0	0	1
1	1	164	2	1	1	0	1	1	0	0	0	0	0	0	0	1	0	2
1	1	164	2	1	1	1	0	0	0	0	0	0	0	0	0	0	0	1
1	1	151	2	1	2	1	0	0	0	0	0	0	0	0	0	0	0	2
1	1	151	2	1	2	0	0	1	1	0	0	1	0	0	0	0	0	2
1	1	53	1	1	2	0	0	0	0	0	0	0	0	0	0	1	0	2
1	1	151	2	1	1	1	0	0	0	0	0	0	0	0	0	0	0	1
1	1	93	1	1	2	0	1	0	0	0	0	0	0	0	1	0	0	1
1	1	93	1	1	2	1	0	0	0	0	0	0	0	0	0	0	0	2
1	1	93	2	1	2	0	0	1	1	1	0	0	0	0	1	0	0	1
1	1	93	2	1	1	0	1	0	0	0	0	1	0	0	1	1	0	1
1	1	93	2	1	1	0	0	1	0	0	0	0	0	0	0	0	0	1
1	1	93	2	1	2	0	1	0	0	0	0	0	0	0	0	0	0	1
1	1	93	2	1	2	0	1	1	0	0	0	0	0	0	0	0	0	2
1	1	93	1	1	2	1	0	0	0	0	0	0	0	0	0	0	0	2
1	1	53	2	1	2	0	0	0	0	0	0	0	0	0	1	1	0	1
1	1	53	2	1	2	1	0	0	0	0	0	0	0	0	0	0	0	2
1	1	93	2	1	2	1	0	0	0	0	0	0	0	0	0	0	0	2
1	1	93	2	1	1	1	0	0	0	0	0	0	0	0	0	0	0	2
1	1	93	2	1	2	0	1	1	0	0	0	0	0	0	0	0	0	2
1	1	93	2	1	2	1	0	0	0	0	0	0	0	0	0	0	0	2
1	1	93	2	1	2	0	0	0	1	1	0	0	0	0	1	0	0	1
1	1	93	2	1	2	0	1	0	0	0	0	0	0	0	1	0	0	1
1	1	93	2	1	2	0	1	1	0	0	0	0	0	0	0	0	0	2
1	1	93	2	1	2	1	0	0	0	0	0	0	0	0	0	0	0	2
1	1	93	2	1	1	0	1	0	0	0	0	0	0	0	0	0	0	2
1	1	93	1	1	2	0	0	0	1	0	0	0	0	0	0	0	0	1
1	1	93	2	1	2	0	1	1	1	0	0	0	0	0	0	0	0	2
1	1	93	1	1	2	0	0	1	0	0	0	0	0	0	0	0	0	2
1	1	53	2	1	1	1	0	0	0	0	0	0	0	0	0	0	0	2
1	1	53	2	1	1	1	0	0	0	0	0	0	0	0	0	0	0	2
1	1	93	2	1	2	0	1	1	0	1	0	1	0	0	0	0	0	2
1	1	93	1	1	2	0	1	1	1	0	0	1	0	0	0	0	0	2
1	1	93	2	1	1	0	0	1	0	0	0	0	0	0	0	1	0	1
1	1	93	1	1	2	0	0	0	0	0	0	1	0	0	0	0	0	2
1	1	93	2	1	1	0	1	0	0	0	0	0	0	0	0	0	0	2
1	1	93	2	1	2	0	0	0	1	0	0	0	0	0	0	0	0	2
1	1	93	2	1	2	1	0	0	0	0	0	0	0	0	0	0	0	2
1	1	93	1	1	1	0	0	1	0	0	0	1	0	0	0	0	0	2
1	1	93	2	1	2	0	0	0	0	0	0	0	0	0	1	0	0	2
1	1	93	2	1	2	1	0	0	0	0	0	0	0	0	0	0	0	2
1	1	53	2	1	2	1	0	0	0	0	0	0	0	0	0	0	0	2
1	1	93	1	1	2	0	1	1	0	0	0	0	0	0	0	0	0	2
1	1	93	1	1	2	1	0	0	0	0	0	0	0	0	0	0	0	2
1	1	93	2	1	2	1	0	0	0	0	0	0	0	0	0	0	0	1
1	1	93	2	1	2	1	0	0	0	0	0	0	0	0	0	0	0	2
1	1	53	2	1	2	1	0	0	0	0	0	0	0	0	0	0	0	2
1	1	93	2	1	2	1	0	0	0	0	0	0	0	0	0	0	0	2
1	1	93	2	1	2	1	0	0	0	0	0	0	0	0	0	0	0	1
1	1	93	2	1	2	0	0	0	1	0	0	0	0	0	0	0	0	1
1	1	93	2	1	2	0	1	1	1	0	0	0	0	0	0	0	0	1
1	1	81	2	1	2	0	0	0	0	0	0	1	0	0	0	0	0	2
1	1	93	2	1	2	0	1	0	1	0	0	0	0	0	0	0	0	1
1	1	81	2	1	1	0	0	0	1	1	0	0	0	0	0	0	0	2
1	1	93	2	1	2	0	0	0	1	1	0	0	0	0	0	1	0	2
1	1	151	2	1	1	1	0	0	0	0	0	0	0	0	0	0	0	2
1	1	151	2	1	2	0	0	1	0	0	0	0	0	0	0	0	0	2
1	1	151	2	1	1	1	0	0	0	0	0	0	0	0	0	0	0	2
1	1	151	2	1	2	1	0	0	0	0	0	0	0	0	0	0	0	2
1	1	151	1	1	2	1	0	0	0	0	0	0	0	0	0	0	0	2
1	1	151	2	1	2	1	0	0	0	0	0	0	0	0	0	0	0	2
1	1	151	2	1	1	1	0	0	0	0	0	0	0	0	0	0	0	2
1	1	151	2	1	2	1	0	0	0	0	0	0	0	0	0	0	0	1
1	1	151	2	1	2	1	0	0	0	0	0	0	0	0	0	0	0	2
1	1	151	2	1	1	0	1	0	0	0	0	0	0	0	0	0	0	2
1	1	151	2	1	2	0	1	0	0	0	0	0	0	0	0	0	0	1
1	1	151	2	1	2	1	0	0	0	0	0	0	0	0	0	0	0	2
1	1	81	2	1	1	0	0	0	0	0	0	0	0	0	1	0	0	2
1	1	164	2	1	2	0	0	0	0	0	0	1	0	0	0	1	0	1
1	1	183	1	1	1	1	0	0	0	0	0	0	0	0	0	0	0	2
1	1	81	2	1	2	1	0	0	0	0	0	0	0	0	0	0	0	2
1	1	151	2	1	2	1	0	0	0	0	0	0	0	0	0	0	0	2
1	1	177	2	1	1	0	1	1	0	0	0	0	0	0	0	0	0	1
1	1	177	2	1	1	0	1	1	0	0	0	0	0	0	0	0	0	1
1	1	177	1	1	2	0	1	1	0	1	0	1	0	0	1	0	0	2
1	1	169	2	1	2	0	1	1	0	0	1	0	1	0	0	0	1	2
1	1	177	2	1	1	0	0	0	0	0	0	1	0	0	0	1	0	2
1	1	177	2	1	1	0	0	0	1	0	0	0	0	0	0	0	0	2
1	1	177	2	1	1	1	0	0	0	0	0	0	0	0	0	0	0	2
1	1	177	2	1	1	1	0	0	0	0	0	0	0	0	0	0	0	2
1	1	177	1	1	1	0	0	0	1	1	0	1	1	0	1	0	0	2
1	1	177	2	1	1	1	0	0	0	0	0	0	0	0	0	0	0	2
1	1	177	2	1	1	0	0	0	0	0	0	0	0	0	0	1	0	2
1	1	177	2	1	1	1	0	0	0	0	0	0	0	0	0	0	0	2
1	1	177	2	1	1	1	0	0	0	0	0	0	0	0	0	0	0	2
1	1	80	2	1	2	0	1	0	0	0	0	0	0	0	0	0	0	1
1	1	177	2	1	1	0	0	0	0	0	0	0	0	1	0	0	0	2
1	1	151	2	1	2	1	0	0	0	0	0	0	0	0	0	0	0	2
1	1	169	2	1	1	1	0	0	0	0	0	0	0	0	0	0	0	2
1	1	131	2	1	1	0	0	1	0	0	0	0	0	0	0	0	0	2
1	1	53	2	1	2	1	0	0	0	0	0	0	0	0	0	0	0	2
1	1	97	2	1	2	1	0	0	0	0	0	0	0	0	0	0	0	1
1	1	131	2	1	2	0	1	1	1	0	0	0	0	0	0	0	0	2
1	1	164	2	1	1	1	0	0	0	0	0	0	0	0	0	0	0	2
1	1	177	2	1	1	1	0	0	0	0	0	0	0	0	0	0	0	2
1	1	111	2	1	2	0	0	1	0	0	0	0	0	0	0	1	0	2
1	1	78	2	1	2	0	0	1	0	0	0	0	0	0	0	0	0	2
1	1	78	1	1	1	0	0	1	0	0	0	0	0	0	0	0	0	1
1	1	78	2	1	2	1	0	0	0	0	0	0	0	0	0	0	0	2
1	1	78	1	1	1	1	0	0	0	0	0	0	0	0	0	0	0	2
1	1	78	2	1	1	0	0	1	0	0	0	0	0	0	0	0	0	1
1	1	78	2	1	1	0	0	0	0	0	0	1	1	0	0	0	0	2
1	1	78	2	1	1	1	0	0	0	0	0	0	0	0	0	0	0	2
1	1	164	1	1	1	0	1	1	1	0	0	0	1	0	0	1	0	1
1	1	151	2	1	2	0	0	0	0	0	0	1	1	0	0	0	0	1
1	1	129	2	1	1	1	0	0	0	0	0	0	0	0	0	0	0	2
1	1	129	2	1	1	0	0	0	1	0	0	0	0	0	0	0	0	2
1	1	183	2	1	1	1	0	0	0	0	0	0	0	0	0	0	0	2
1	1	78	2	1	1	1	0	0	0	0	0	0	0	0	0	0	0	2
1	1	78	1	1	1	0	1	0	0	0	0	0	0	0	0	0	0	2
1	1	111	2	1	2	0	1	1	0	0	0	0	1	0	0	0	0	2
1	1	78	2	1	2	0	1	0	0	0	0	0	0	0	0	0	0	2
1	1	78	2	1	1	0	1	0	0	0	0	0	0	0	1	0	0	1
1	1	78	2	1	1	0	1	0	0	0	0	0	0	0	0	0	0	1
1	1	164	1	1	2	1	0	0	0	0	0	0	0	0	0	0	0	1
1	1	164	2	1	2	0	0	1	0	0	0	0	0	0	0	0	0	2
1	1	164	1	1	1	0	1	1	1	0	0	0	0	0	1	1	0	1
1	1	182	2	1	1	0	1	0	0	0	0	0	0	0	1	1	1	2
1	1	164	2	1	1	0	0	1	1	1	0	0	0	0	0	0	0	2
1	1	182	2	1	1	0	1	1	0	0	0	0	0	0	0	0	0	2
1	1	53	1	1	1	1	0	0	0	0	0	0	0	0	0	0	0	2
1	1	161	2	1	1	1	0	0	0	0	0	0	0	0	0	0	0	2
1	1	182	2	1	2	1	0	0	0	0	0	0	0	0	0	0	0	2
1	1	151	2	1	2	1	0	0	0	0	0	0	0	0	0	0	0	2
1	1	182	1	1	2	1	0	0	0	0	0	0	0	0	0	0	0	2
1	1	182	2	1	1	1	0	0	0	0	0	0	0	0	0	0	0	1
1	1	53	1	1	2	1	0	0	0	0	0	0	0	0	0	0	0	2
1	1	53	2	1	2	1	0	0	0	0	0	0	0	0	0	0	0	2
1	1	161	2	1	1	0	1	1	0	1	0	1	1	1	0	0	0	2
1	1	169	1	1	1	0	1	0	0	0	0	1	1	0	1	0	0	1
1	1	169	2	1	1	1	0	0	0	0	0	0	0	0	0	0	0	2
1	1	169	2	1	1	0	1	0	0	0	0	0	0	0	0	0	0	1
1	1	169	2	1	1	0	1	0	0	0	0	0	0	0	0	0	0	1
1	1	169	2	1	1	1	0	0	0	0	0	0	0	0	0	0	0	2
1	1	169	2	1	1	1	0	0	0	0	0	0	0	0	0	0	0	1
1	1	169	2	1	1	0	0	1	0	0	0	0	0	0	0	0	0	2
1	1	169	2	1	1	0	0	0	1	0	0	0	1	0	1	1	0	1
1	1	169	2	1	1	0	1	1	0	0	0	0	0	0	0	0	0	1
1	1	169	1	1	1	0	0	1	0	0	0	0	0	0	0	0	0	2
1	1	169	2	1	1	1	0	0	0	0	0	0	0	0	0	0	0	2
1	1	161	2	1	1	0	1	0	1	0	0	0	0	0	0	0	0	1
1	1	161	1	1	1	0	0	0	1	0	0	0	0	0	0	0	0	2
1	1	87	2	1	2	1	0	0	0	0	0	0	0	0	0	0	0	2
1	1	53	2	1	1	0	1	1	1	0	0	0	0	0	0	0	0	1
1	1	87	2	1	2	0	0	1	0	0	0	0	0	0	0	0	0	2
1	1	191	1	1	1	1	0	0	0	0	0	0	0	0	0	0	0	2
1	1	132	2	1	2	0	0	0	0	0	0	0	0	0	0	0	1	2
1	1	169	1	1	1	0	0	0	0	0	0	0	0	0	0	1	0	2
1	1	182	1	1	2	0	1	1	1	0	0	1	0	0	1	1	0	1
1	1	129	1	1	1	0	0	1	0	0	0	0	0	0	0	0	0	2
1	1	129	2	1	1	0	0	1	0	0	0	0	0	0	0	0	0	2
1	1	81	1	1	2	1	0	0	0	0	0	0	0	0	0	0	0	2
1	1	167	2	1	2	1	0	0	0	0	0	0	0	0	0	0	0	2
1	2	183	2	1	2	1	0	0	0	0	0	0	0	0	0	0	0	2
1	2	183	2	1	2	0	0	0	0	0	0	1	0	0	0	1	0	2
1	2	183	2	1	1	0	0	0	0	0	1	0	0	0	0	0	0	2
1	2	169	2	1	1	0	0	0	0	1	0	0	0	0	0	0	0	2
1	2	81	2	1	1	0	0	0	0	0	0	0	0	0	0	1	0	2
1	2	93	2	1	1	1	0	0	0	0	0	0	0	0	0	0	0	2
1	2	164	1	1	1	0	0	1	1	0	0	0	0	0	0	0	0	2
1	2	169	2	1	1	1	0	0	0	0	0	0	0	0	0	0	0	2
1	2	169	1	1	1	0	0	0	0	0	0	0	0	0	0	1	0	2
1	2	169	2	1	1	1	0	0	0	0	0	0	0	0	0	0	0	2
1	2	151	2	1	2	1	0	0	0	0	0	0	0	0	0	0	0	2
1	2	9	1	1	1	1	0	0	0	0	0	0	0	0	0	0	0	1
1	2	151	2	1	2	0	0	0	0	0	0	1	0	0	0	0	0	2
1	2	169	2	1	1	1	0	0	0	0	0	0	0	0	0	0	0	2
1	2	129	2	1	2	0	0	1	0	0	0	0	0	0	0	0	0	2
1	2	151	2	1	1	1	0	0	0	0	0	0	0	0	0	0	0	2
1	2	93	2	1	1	0	1	1	0	0	0	0	0	0	0	0	0	2
1	2	93	2	1	1	0	1	1	0	0	0	0	0	0	1	1	0	2
1	2	53	2	1	2	0	0	1	0	0	0	0	0	0	0	0	0	2
1	2	169	2	1	1	0	0	0	1	0	0	0	0	0	0	0	0	2
1	2	169	1	1	2	0	1	1	1	1	0	1	1	1	1	1	0	1
1	2	169	2	1	1	1	0	0	0	0	0	0	0	0	0	0	0	2
1	2	169	2	1	1	0	1	0	0	0	0	1	0	0	1	0	0	2
1	2	169	2	1	1	1	0	0	0	0	0	0	0	0	0	0	0	2
1	2	53	2	1	2	0	1	1	0	0	0	1	0	0	0	0	0	2
1	2	53	2	1	1	0	1	0	1	0	0	0	0	0	0	0	0	2
1	2	169	1	1	1	1	0	0	0	0	0	0	0	0	0	0	0	1
1	2	169	2	1	1	1	0	0	0	0	0	0	0	0	0	0	0	2
1	2	169	2	1	2	1	0	1	0	0	0	0	0	0	0	0	0	2
1	2	169	2	1	1	0	0	1	0	0	0	0	0	0	1	0	0	2
1	2	169	2	1	1	0	0	1	0	0	0	0	0	0	0	0	0	2
1	2	169	2	1	1	1	0	0	0	0	0	0	0	0	0	0	0	2
1	2	169	2	1	2	1	0	0	0	0	0	0	0	0	0	0	0	2
1	2	169	2	1	1	1	0	0	0	0	0	0	0	0	0	0	0	2
1	2	169	2	1	1	1	0	0	0	0	0	0	0	0	0	0	0	2
1	2	169	2	1	1	1	0	0	0	0	0	0	0	0	0	0	0	2
1	2	164	2	1	2	0	0	1	0	0	0	0	0	0	0	0	0	2
1	2	151	1	1	2	0	0	0	0	0	0	0	0	0	0	1	0	2
1	2	151	2	1	2	1	0	0	0	0	0	0	0	0	0	0	0	2
1	2	93	1	1	1	0	0	1	1	0	0	0	0	0	0	0	0	2
1	2	93	1	1	1	0	0	1	0	0	0	0	1	0	0	0	1	2
1	2	93	2	1	1	1	0	0	0	0	0	0	0	0	0	0	0	2
1	2	93	2	1	1	0	1	0	0	0	0	0	0	0	0	0	0	2
1	2	93	2	1	1	0	0	0	1	0	0	0	0	0	0	0	0	2
1	2	93	1	1	2	0	0	1	1	0	0	0	0	0	0	0	0	2
1	2	93	2	1	2	1	0	0	0	0	0	0	0	0	0	0	0	2
1	2	169	2	1	1	0	0	0	0	0	0	1	1	0	0	0	0	2
1	2	53	2	1	1	1	0	0	0	0	0	0	0	0	0	0	0	2
1	2	93	2	1	1	1	0	0	0	0	0	0	0	0	0	0	0	2
1	2	93	1	1	2	1	0	0	0	0	0	0	0	0	0	0	0	2
1	2	93	1	1	2	0	0	0	1	0	0	0	1	0	1	0	0	2
1	2	93	2	1	1	0	0	1	0	0	0	0	0	0	0	1	0	2
1	2	93	1	1	2	0	1	0	1	0	0	0	0	0	0	0	0	2
1	2	93	2	1	2	1	0	0	0	0	0	0	0	0	0	0	0	2
1	2	93	1	1	2	1	0	0	0	0	0	0	0	0	0	0	0	2
1	2	93	2	1	1	1	0	0	0	0	0	0	0	0	0	0	0	2
1	2	151	2	1	1	0	0	1	0	0	0	0	0	0	0	0	0	2
1	2	93	2	1	1	0	0	0	1	0	0	0	1	0	0	0	0	2
1	2	93	2	1	1	0	0	1	0	0	0	0	0	0	0	0	0	2
1	2	93	2	1	1	0	0	0	0	0	0	0	0	0	1	0	0	2
1	2	131	2	1	1	1	0	0	0	0	0	0	0	0	0	0	0	2
1	2	151	2	1	2	1	0	0	0	0	0	0	0	0	0	0	0	2
1	2	93	2	1	2	0	0	1	0	0	0	0	0	0	0	0	0	2
1	2	93	1	1	2	1	0	0	0	0	0	0	0	0	0	0	0	2
1	2	191	2	1	1	0	0	0	0	0	0	1	0	0	0	0	0	2
1	2	81	2	1	1	1	0	0	0	0	0	0	0	0	0	0	0	2
1	2	81	2	1	2	0	0	0	0	0	0	1	0	0	1	1	0	2
1	2	151	1	1	1	0	1	0	0	0	0	0	0	0	0	1	0	2
1	2	151	2	1	2	1	0	0	0	0	0	0	0	0	0	0	0	2
1	2	151	2	1	2	1	0	0	0	0	0	0	0	0	0	0	0	2
1	2	151	2	1	2	0	0	0	0	0	0	1	1	0	0	0	0	2
1	2	151	2	1	2	1	0	0	0	0	0	0	0	0	0	0	0	2
1	2	53	2	1	1	1	0	0	0	0	0	0	0	0	0	0	0	2
1	2	53	2	1	1	1	0	0	0	0	0	0	0	0	0	0	0	2
1	2	151	2	1	2	0	0	0	0	0	0	1	1	0	0	1	0	2
1	2	151	2	1	2	1	0	0	0	0	0	0	0	0	0	0	0	2
1	2	151	2	1	2	1	0	0	0	0	0	0	0	0	0	0	0	2
1	2	183	2	1	2	0	1	0	0	0	0	0	0	1	0	0	0	2
1	2	62	2	1	1	1	0	0	0	0	0	0	0	0	0	0	0	2
1	2	62	2	1	1	1	0	0	0	0	0	0	0	0	0	0	0	2
1	2	100	1	1	1	0	0	0	0	0	0	1	0	0	1	0	0	2
1	2	151	2	1	2	1	0	0	0	0	0	0	0	0	0	0	0	2
1	2	177	2	1	1	0	0	0	0	0	0	0	0	0	0	1	0	2
1	2	177	2	1	1	0	1	0	1	0	0	1	0	1	1	0	0	2
1	2	177	2	1	1	0	1	0	0	0	0	0	0	0	0	0	0	1
1	2	177	1	1	1	1	0	0	0	0	0	0	0	0	0	0	0	2
1	2	177	2	1	1	0	0	0	0	0	0	0	0	0	0	1	0	2
1	2	177	2	1	1	1	0	0	0	0	0	0	0	0	0	0	0	2
1	2	177	2	1	1	1	0	0	0	0	0	0	0	0	0	0	0	2
1	2	87	2	1	2	1	0	0	0	0	0	0	0	0	0	0	0	2
1	2	81	1	1	1	1	0	0	0	0	0	0	0	0	0	0	0	2
1	2	177	2	1	1	1	0	0	0	0	0	0	0	0	0	0	0	2
1	2	177	1	1	2	1	0	0	0	0	0	0	0	0	0	0	0	2
1	2	177	2	1	2	0	0	0	0	0	0	0	1	0	0	0	0	2
1	2	177	2	1	1	0	0	0	0	0	0	0	0	0	0	1	0	1
1	2	177	2	1	1	0	0	0	0	0	0	0	0	1	0	0	0	2
1	2	177	2	1	1	1	0	1	0	0	0	0	0	0	0	0	0	2
1	2	177	2	1	1	0	0	0	1	1	0	0	0	0	0	0	0	2
1	2	177	2	1	1	1	0	0	0	0	0	0	0	0	0	0	0	2
1	2	177	2	1	2	0	0	0	0	0	0	0	0	0	1	0	0	2
1	2	177	2	1	1	1	0	0	0	0	0	0	0	0	0	0	0	2
1	2	177	2	1	1	0	0	0	1	0	0	0	0	0	0	0	0	2
1	2	177	2	1	1	1	0	0	0	0	0	0	0	0	0	0	0	2
1	2	177	2	1	1	1	0	0	0	0	0	0	0	0	0	0	0	2
1	2	177	2	1	1	0	1	0	0	0	0	0	0	0	1	0	0	1
1	2	177	2	1	1	0	0	0	0	0	0	1	0	0	0	1	0	2
1	2	177	2	1	1	0	0	0	0	0	0	1	1	0	0	1	0	2
1	2	177	2	1	2	0	0	0	0	0	0	0	0	0	0	1	0	2
1	2	177	2	1	1	0	0	0	0	1	0	0	0	0	1	0	0	2
1	2	177	2	1	1	0	0	0	0	0	0	1	0	0	0	0	0	2
1	2	177	2	1	1	1	0	0	0	0	0	0	0	0	0	0	0	2
1	2	177	2	1	1	0	0	1	0	0	0	0	0	0	0	0	0	2
1	2	177	2	1	1	0	0	0	0	0	0	0	0	0	1	1	0	2
1	2	177	2	1	1	0	0	1	0	0	0	0	0	0	0	0	0	2
1	2	177	2	1	1	0	0	0	1	0	0	0	0	0	0	1	0	2
1	2	151	2	1	1	1	0	0	0	0	0	0	0	0	0	0	0	2
1	2	151	2	1	1	1	0	0	0	0	0	0	0	0	0	0	0	2
1	2	177	2	1	2	1	0	0	0	0	0	0	0	0	0	0	0	2
1	2	177	2	1	1	1	0	0	0	0	0	0	0	0	0	0	0	2
1	2	177	2	1	1	0	0	1	0	0	0	0	0	0	0	0	0	2
1	2	131	2	1	2	1	0	0	0	0	0	0	0	0	0	0	0	2
1	2	131	1	1	2	1	0	0	0	0	0	0	0	0	0	0	0	2
1	2	131	1	1	2	1	0	0	0	0	0	0	0	0	0	0	0	2
1	2	164	1	1	1	1	0	0	0	0	0	0	0	0	0	0	0	2
1	2	53	2	1	1	1	0	0	0	0	0	0	0	0	0	0	0	2
1	2	106	2	1	2	1	0	0	0	0	0	0	0	0	0	0	0	2
1	2	53	2	1	1	0	0	1	0	0	0	0	0	0	0	0	0	2
1	2	131	2	1	1	0	0	1	0	0	0	0	0	0	0	0	0	2
1	2	131	2	1	1	0	0	1	0	0	0	0	1	0	0	0	0	2
1	2	131	2	1	1	1	0	0	0	0	0	0	0	0	0	0	0	2
1	2	182	1	1	1	0	0	1	0	0	0	0	0	0	0	1	0	2
1	2	177	2	1	1	0	0	0	1	0	0	1	1	0	0	1	0	2
1	2	177	1	1	1	0	1	0	0	0	0	1	1	0	0	1	0	2
1	2	78	2	1	2	0	1	0	0	0	0	0	0	0	0	0	0	2
1	2	131	2	1	2	0	1	0	1	0	0	0	0	0	0	0	0	2
1	2	78	2	1	2	1	0	0	0	0	0	0	0	0	0	0	0	2
1	2	183	2	1	1	1	0	0	0	0	0	0	0	0	0	0	0	2
1	2	78	2	1	1	1	0	0	0	0	0	0	0	0	0	0	0	2
1	2	182	2	1	2	0	0	1	1	0	0	0	0	0	0	0	0	2
1	2	78	2	1	1	1	0	0	0	0	0	0	0	0	0	0	0	2
1	2	78	2	1	1	0	0	1	0	0	0	0	1	0	0	0	0	2
1	2	78	2	1	1	0	0	1	0	0	0	1	1	0	0	0	0	2
1	2	141	1	1	2	0	0	1	0	0	0	0	0	0	0	0	0	2
1	2	78	2	1	2	0	1	1	0	0	0	0	0	0	0	1	0	2
1	2	78	2	1	1	1	0	0	0	0	0	0	0	0	0	0	0	2
1	2	78	2	1	1	1	0	0	0	0	0	0	0	0	0	0	0	2
1	2	78	2	1	1	0	0	0	0	0	0	1	0	0	0	0	0	2
1	2	78	2	1	1	0	0	0	0	0	0	1	0	0	0	0	0	2
1	2	78	2	1	1	1	0	0	0	0	0	0	0	0	0	0	0	2
1	2	78	1	1	1	1	0	0	0	0	0	0	0	0	0	0	0	2
1	2	78	2	1	1	1	0	0	0	0	0	0	0	0	0	0	0	2
1	2	78	2	1	1	0	0	1	0	0	0	0	1	0	0	0	0	2
1	2	78	2	1	1	1	0	0	0	0	0	0	0	0	0	0	0	2
1	2	177	2	1	2	0	0	1	0	0	0	0	0	0	1	0	0	2
1	2	78	2	1	1	1	0	0	0	0	0	0	0	0	0	0	0	2
1	2	78	2	1	1	0	0	0	0	0	0	0	1	0	1	0	0	2
1	2	78	2	1	2	1	0	0	0	0	0	0	0	0	0	0	0	2
1	2	78	2	1	1	1	0	0	0	0	0	0	0	0	0	0	0	2
1	2	78	2	1	1	1	0	0	0	0	0	0	0	0	0	0	0	2
1	2	78	1	1	2	1	0	0	0	0	0	0	0	0	0	0	0	2
1	2	78	2	1	1	0	0	0	0	1	0	0	0	0	0	0	0	2
1	2	164	1	1	1	0	0	0	1	0	0	0	0	0	0	0	0	2
1	2	164	1	1	1	0	0	1	0	0	0	0	0	0	0	1	0	2
1	2	151	2	1	2	0	0	1	1	0	0	0	0	0	0	0	0	2
1	2	78	2	1	2	1	0	0	0	0	0	0	0	0	0	0	0	2
1	2	164	2	1	1	0	1	0	0	0	0	0	0	0	0	0	0	2
1	2	164	2	1	1	1	0	0	0	0	0	0	0	0	0	0	0	2
1	2	164	1	1	2	0	0	0	1	0	0	0	1	0	0	0	0	2
1	2	164	2	1	2	1	0	0	0	0	0	0	0	0	0	0	0	2
1	2	164	1	1	1	0	0	1	0	0	0	0	0	0	1	1	0	2
1	2	183	2	1	1	1	0	0	0	0	0	0	0	0	0	0	0	2
1	2	78	2	1	2	0	0	0	0	0	0	0	0	0	1	0	0	2
1	2	78	1	1	1	0	0	1	0	0	0	0	0	0	0	0	0	2
1	2	182	2	1	1	0	1	0	0	0	0	0	0	0	0	0	0	2
1	2	182	2	1	1	1	0	0	0	0	0	0	0	0	0	0	0	2
1	2	182	2	1	1	1	0	0	0	0	0	0	0	0	0	0	0	2
1	2	164	1	1	1	0	0	1	1	0	0	1	0	1	0	1	0	2
1	2	182	2	1	1	0	0	1	0	1	0	0	0	0	0	0	0	2
1	2	131	2	1	1	1	0	0	0	0	0	0	0	0	0	0	0	2
1	2	191	2	1	1	0	0	1	0	0	0	0	0	0	0	0	0	2
1	2	53	2	1	2	0	0	0	1	0	0	0	0	0	0	0	0	2
1	2	164	2	1	1	0	0	1	0	0	0	0	0	0	1	0	0	2
1	2	78	2	1	1	1	0	0	0	0	0	0	0	0	0	0	0	2
1	2	164	1	1	2	0	0	1	1	0	0	0	0	0	0	0	0	2
1	2	164	2	1	1	1	0	0	0	0	0	0	0	0	0	0	0	2
1	2	182	2	1	1	1	0	0	0	0	0	0	0	0	0	0	0	2
1	2	182	2	1	1	0	1	1	1	0	0	0	0	0	0	0	0	2
1	2	3	2	1	1	1	0	0	0	0	0	0	0	0	0	0	0	2
1	2	131	2	1	1	0	0	0	0	0	0	0	1	0	0	0	0	2
1	2	183	1	1	1	0	1	1	0	0	0	0	0	0	1	0	0	1
1	2	151	2	1	2	1	0	0	0	0	0	0	0	0	0	0	0	2
1	2	182	2	1	1	0	0	1	0	0	0	0	0	0	0	0	0	2
1	2	182	2	1	2	1	0	0	0	0	0	0	0	0	0	0	0	2
1	2	182	2	1	1	1	0	0	0	0	0	0	0	0	0	0	0	2
1	2	169	1	1	1	0	0	0	1	0	1	0	0	0	1	1	0	1
1	2	182	2	1	2	1	0	0	0	0	0	0	0	0	0	0	0	2
1	2	183	2	1	2	1	0	0	0	0	0	0	0	0	0	0	0	2
1	2	131	2	1	1	1	0	0	0	0	0	0	0	0	0	0	0	2
1	2	129	2	1	2	0	0	1	0	0	0	0	0	0	0	0	0	2
1	2	87	2	1	1	0	0	0	0	0	0	1	0	0	0	0	0	2
1	2	87	2	1	1	1	0	0	0	0	0	0	0	0	0	0	0	2
1	2	169	2	1	1	1	0	0	0	0	0	0	0	0	0	0	0	2
1	2	164	2	1	1	1	0	0	0	0	0	0	0	0	0	0	0	2
1	2	169	2	1	1	1	0	0	0	0	0	0	0	0	0	0	0	2
1	2	182	2	1	1	1	0	0	0	0	0	0	0	0	0	0	0	2
1	2	169	2	1	2	1	0	0	0	0	0	0	0	0	0	0	0	2
1	2	169	2	1	2	1	0	0	0	0	0	0	0	0	0	0	0	2
1	2	169	2	1	1	0	0	1	0	0	0	0	0	0	0	0	0	2
1	2	169	2	1	2	1	0	0	0	0	0	0	0	0	0	0	0	2
1	2	169	2	1	1	0	0	1	1	0	0	1	1	0	0	1	0	1
1	2	169	2	1	1	1	0	0	0	0	0	0	0	0	0	0	0	1
1	2	169	2	1	1	1	0	0	0	0	0	0	0	0	0	0	0	2
1	2	97	2	1	1	0	0	1	0	0	0	0	0	0	0	0	0	2
1	2	169	2	1	1	1	0	0	0	0	0	0	0	0	0	0	0	2
1	2	87	2	1	1	0	1	1	1	0	0	0	0	0	0	0	0	2
1	2	87	2	1	1	1	0	0	0	0	0	0	0	0	0	0	0	2
1	2	87	2	1	2	1	0	0	0	0	0	0	0	0	0	0	0	2
1	2	87	2	1	1	0	1	1	0	0	0	0	0	0	1	0	0	2
1	2	129	1	1	1	0	0	0	0	0	0	0	0	0	1	0	0	1
1	2	87	2	1	1	1	0	0	0	0	0	0	0	0	0	0	0	2
1	2	129	1	1	1	1	0	0	0	0	0	0	0	0	0	0	0	2
1	2	169	2	1	2	0	0	1	0	0	0	0	0	0	0	0	0	2
1	2	119	1	1	1	1	0	0	0	0	0	0	0	0	0	0	0	2
1	2	119	2	1	1	0	0	1	1	0	0	1	0	0	0	0	0	2
1	2	119	2	1	1	0	1	0	1	0	0	1	1	0	1	0	0	2
1	2	119	1	1	2	0	0	0	0	0	0	0	0	0	1	1	0	2
1	2	81	2	1	2	1	0	0	0	0	0	0	0	0	0	0	0	2
1	2	81	1	1	1	1	0	0	0	0	0	0	0	0	0	0	0	2
1	2	53	1	1	1	0	0	0	0	0	1	0	0	0	0	0	0	2
1	2	45	2	1	2	1	0	0	0	0	0	0	0	0	0	0	0	2
1	2	119	2	1	1	1	0	0	0	0	0	0	0	0	0	0	0	2
1	2	191	2	1	1	1	0	0	0	0	0	0	0	0	0	0	0	1
1	2	13	1	1	1	0	0	1	0	0	0	0	0	0	0	0	0	2
1	2	184	2	1	1	1	0	0	0	0	0	0	0	0	0	0	0	2
1	2	129	2	1	1	1	0	0	0	0	0	0	0	0	0	0	0	2
1	2	167	2	1	1	1	0	0	0	0	0	0	0	0	0	0	0	2
1	2	184	1	1	1	1	0	0	0	0	0	0	0	0	0	0	0	2
1	2	184	2	1	2	1	0	0	0	0	0	0	0	0	0	0	0	2
1	1	183	2	2	2	0	1	0	1	0	0	0	0	0	0	0	0	2
1	1	169	2	2	2	1	0	0	0	0	0	0	0	0	0	0	0	2
1	1	183	2	2	2	0	0	0	1	0	0	0	1	0	0	0	0	1
1	1	183	2	2	2	0	1	0	0	0	0	0	0	0	1	0	0	2
1	1	183	1	2	2	0	0	0	0	0	1	0	0	1	0	0	0	2
1	1	151	2	2	2	1	0	0	0	0	0	0	0	0	0	0	0	2
1	1	151	2	2	2	0	1	0	0	0	0	0	0	0	0	0	0	2
1	1	53	2	2	2	0	0	0	1	0	0	0	0	0	1	0	0	2
1	1	151	2	2	2	0	0	0	0	0	0	0	0	0	1	1	0	2
1	1	151	2	2	2	1	0	0	0	0	0	0	0	0	0	0	0	2
1	1	183	2	2	2	0	1	0	1	1	0	0	0	0	0	0	0	2
1	1	151	2	2	2	0	0	0	0	0	0	1	0	1	1	1	0	2
1	1	151	2	2	2	1	0	1	0	0	0	0	0	0	0	0	0	2
1	1	151	2	2	2	1	0	0	0	0	0	0	0	0	0	0	0	1
1	1	151	2	2	2	0	0	0	0	0	0	1	1	0	1	1	0	1
1	1	151	2	2	2	1	0	0	0	0	0	0	0	0	0	0	0	1
1	1	151	2	2	2	1	0	0	0	0	0	0	0	0	0	0	0	2
1	1	151	2	2	2	0	0	0	0	0	0	0	0	0	0	1	0	2
1	1	182	2	2	2	0	0	0	0	0	0	1	0	0	0	0	0	2
1	1	183	2	2	2	1	0	0	0	0	0	0	0	0	0	0	0	2
1	1	151	2	2	2	1	0	0	0	0	0	0	0	0	0	0	0	2
1	1	151	2	2	2	1	0	0	0	0	0	0	0	0	0	0	0	2
1	1	183	1	2	2	0	0	0	1	0	0	1	0	1	0	0	0	2
1	1	183	2	2	2	0	1	0	0	0	0	1	1	0	1	1	1	2
1	1	62	2	2	2	1	0	0	0	0	0	0	0	0	0	0	0	2
1	1	183	2	2	2	1	0	0	0	0	0	0	0	0	0	0	0	2
1	1	151	2	2	2	0	0	0	0	0	0	1	0	0	0	1	0	2
1	1	151	1	2	2	1	0	0	0	0	0	0	0	0	0	0	0	2
1	1	53	2	2	2	1	0	0	0	0	0	0	0	0	0	0	0	2
1	1	53	2	2	2	1	0	0	0	0	0	0	0	0	0	0	0	2
1	1	106	2	2	2	0	0	1	0	0	0	0	0	0	0	0	0	2
1	1	53	1	2	2	0	0	0	1	0	0	0	0	0	0	0	0	1
1	1	151	2	2	2	0	0	0	0	0	0	0	1	0	0	0	0	1
1	1	151	2	2	2	1	0	0	0	0	0	0	0	0	0	0	0	2
1	1	151	2	2	2	1	0	0	0	0	0	0	0	0	0	0	0	2
1	1	151	2	2	2	1	0	0	0	0	0	0	0	0	0	0	0	2
1	1	151	2	2	2	0	1	1	1	1	0	0	0	0	0	0	0	1
1	1	151	1	2	2	0	0	0	0	0	0	0	1	0	1	0	0	2
1	1	151	2	2	2	0	1	0	0	0	0	0	0	0	0	0	0	2
1	1	151	2	2	2	0	1	0	1	0	0	0	0	0	0	0	0	2
1	1	151	2	2	2	1	0	0	0	0	0	0	0	0	0	0	0	2
1	1	183	1	2	2	1	0	0	0	0	0	0	0	0	0	0	0	2
1	1	151	2	2	2	1	0	0	0	0	0	0	0	0	0	0	0	2
1	1	106	2	2	2	1	0	0	0	0	0	0	0	0	0	0	0	2
1	1	151	2	2	2	1	0	0	0	0	0	0	0	0	0	0	0	2
1	1	151	2	2	2	1	0	0	0	0	0	0	0	0	0	0	0	2
1	1	106	2	2	2	0	0	1	0	0	0	0	0	0	0	0	0	2
1	1	106	2	2	2	0	0	1	0	0	0	0	0	0	0	0	0	2
1	1	93	2	2	2	0	0	1	0	0	0	0	0	0	0	0	0	1
1	1	93	2	2	2	0	0	1	0	0	0	0	0	0	0	0	0	2
1	1	106	2	2	2	0	0	1	0	0	0	0	0	0	0	0	0	2
1	1	53	2	2	2	1	0	0	0	0	0	0	0	0	0	0	0	1
1	1	169	2	2	2	0	1	0	0	0	0	0	0	0	0	0	0	1
1	1	169	2	2	2	1	0	0	0	0	0	0	0	0	0	0	0	1
1	1	169	1	2	2	0	1	1	0	0	0	0	0	0	0	0	0	2
1	1	169	2	2	2	1	0	0	0	0	0	0	0	0	0	0	0	2
1	1	169	2	2	2	0	1	0	0	0	0	0	0	0	1	1	0	1
1	1	169	2	2	2	0	0	1	0	0	0	0	0	0	0	1	0	2
1	1	169	2	2	2	0	0	1	0	0	0	0	0	0	0	1	0	2
1	1	169	2	2	2	1	0	0	0	0	0	0	0	0	0	0	0	2
1	1	169	2	2	2	0	1	1	0	0	0	0	0	0	0	0	0	1
1	1	169	2	2	2	1	0	0	0	0	0	0	0	0	0	0	0	2
1	1	169	2	2	2	1	0	0	0	0	0	0	0	0	0	0	0	2
1	1	53	1	2	2	1	0	0	0	0	0	0	0	0	0	0	0	1
1	1	169	2	2	2	0	0	1	0	0	0	0	0	0	0	0	0	2
1	1	169	2	2	2	1	0	0	0	0	0	0	0	0	0	0	0	2
1	1	93	2	2	2	0	0	0	0	0	0	0	0	0	1	0	0	2
1	1	78	2	2	2	1	0	0	0	0	0	0	0	0	0	0	0	1
1	1	78	2	2	2	0	1	0	0	0	0	0	1	0	0	0	0	1
1	1	151	2	2	2	1	0	0	0	0	0	0	0	0	0	0	0	1
1	1	169	2	2	2	0	0	1	0	0	0	0	0	0	0	0	0	2
1	1	151	2	2	2	0	0	1	0	0	0	0	0	0	0	0	0	2
1	1	169	2	2	2	0	0	0	0	0	0	0	1	0	1	0	0	1
1	1	169	2	2	2	0	0	1	0	0	0	0	0	0	0	0	0	1
1	1	169	1	2	2	0	0	1	0	0	0	0	0	0	0	1	0	1
1	1	169	1	2	2	0	1	1	1	0	0	0	0	0	0	0	0	2
1	1	169	2	2	2	1	0	0	0	0	0	0	0	0	0	0	0	2
1	1	151	2	2	2	1	0	0	0	0	0	0	0	0	0	0	0	2
1	1	151	2	2	2	1	0	0	0	0	0	0	0	0	0	0	0	2
1	1	169	2	2	2	1	0	0	0	0	0	0	0	0	0	0	0	2
1	1	53	2	2	2	0	1	0	0	0	0	0	0	0	0	0	0	2
1	1	151	2	2	2	1	0	0	0	0	0	0	0	0	0	0	0	2
1	1	93	2	2	2	0	0	0	0	0	0	1	0	0	1	0	0	1
1	1	169	2	2	2	1	0	0	0	0	0	0	0	0	0	0	0	2
1	1	191	2	2	2	1	0	0	0	0	0	0	0	0	0	0	0	2
1	1	169	2	2	2	0	0	0	0	0	0	0	0	1	0	0	0	1
1	1	169	2	2	2	0	1	0	0	0	0	0	0	0	0	0	0	1
1	1	151	2	2	2	0	0	0	0	0	0	1	0	0	0	0	0	2
1	1	169	2	2	2	1	0	0	0	0	0	0	0	0	0	0	0	2
1	1	151	2	2	2	1	0	0	0	0	0	0	0	0	0	0	0	2
1	1	151	2	2	2	1	0	0	0	0	0	0	0	0	0	0	0	2
1	1	151	2	2	2	1	0	0	0	0	0	0	0	0	0	0	0	2
1	1	177	2	2	2	1	0	0	0	0	0	0	0	0	0	0	0	2
1	1	169	2	2	2	1	0	0	0	0	0	0	0	0	0	0	0	1
1	1	151	2	2	2	1	0	0	0	0	0	0	0	0	0	0	0	2
1	1	184	2	2	2	1	0	0	0	0	0	0	0	0	0	0	0	2
1	1	151	2	2	2	0	1	0	0	0	0	0	0	0	0	1	0	1
1	1	182	1	2	2	0	0	1	1	0	0	1	0	1	0	0	0	2
1	1	66	2	2	2	1	0	0	0	0	0	0	0	0	0	0	0	2
1	1	151	1	2	2	1	0	0	0	0	0	0	0	0	0	0	0	2
1	1	164	2	2	2	1	0	0	0	0	0	0	0	0	0	0	0	2
1	1	164	2	2	2	1	0	0	0	0	0	0	0	0	0	0	0	2
1	1	45	2	2	2	1	0	0	0	0	0	0	0	0	0	0	0	1
1	1	177	2	2	2	1	0	0	0	0	0	0	0	0	0	0	0	2
1	1	53	2	2	2	1	0	0	0	0	0	0	0	0	0	0	0	2
1	1	111	2	2	2	1	0	0	0	0	0	0	0	0	0	0	0	2
1	1	182	2	2	2	1	0	0	0	0	0	0	0	0	0	0	0	2
1	1	151	2	2	2	0	1	1	1	0	0	0	0	0	0	0	0	2
1	1	111	2	2	2	0	1	0	0	0	0	0	0	0	1	0	0	2
1	1	111	2	2	2	1	0	0	0	0	0	0	0	0	0	0	0	1
1	1	169	1	2	2	1	0	0	0	0	0	0	0	0	0	0	0	2
1	1	151	2	2	2	1	0	0	0	0	0	0	0	0	0	0	0	2
1	1	151	2	2	2	1	0	0	0	0	0	0	0	0	0	0	0	2
1	1	151	2	2	2	1	0	0	0	0	0	0	0	0	0	0	0	2
1	1	151	2	2	2	1	0	0	0	0	0	0	0	0	0	0	0	2
1	1	151	2	2	2	1	0	0	0	0	0	0	0	0	0	0	0	2
1	1	151	1	2	2	1	0	0	0	0	0	0	0	0	0	0	0	2
1	1	151	2	2	2	1	0	0	0	0	0	0	0	0	0	0	0	2
1	1	151	2	2	2	1	0	0	0	0	0	0	0	0	0	0	0	2
1	1	182	2	2	2	1	0	0	0	0	0	0	0	0	0	0	0	2
1	1	167	2	2	2	1	0	0	0	0	0	0	0	0	0	0	0	2
1	1	53	2	2	2	0	1	1	0	0	0	0	0	0	0	0	0	1
1	1	151	2	2	2	1	0	0	0	0	0	0	0	0	0	0	0	2
1	1	151	2	2	2	0	0	0	1	0	0	0	0	1	0	0	0	2
1	1	151	2	2	2	0	0	1	0	0	0	0	0	0	0	0	0	2
1	1	151	2	2	2	1	0	0	0	0	0	0	0	0	0	0	0	1
1	1	53	2	2	2	1	0	0	0	0	0	0	0	0	0	0	0	2
1	1	93	2	2	2	1	0	0	0	0	0	0	0	0	0	0	0	1
1	1	78	2	2	2	0	1	1	0	0	0	0	0	0	0	0	0	1
1	1	93	2	2	2	1	0	0	0	0	0	0	0	0	0	0	0	2
1	1	151	2	2	2	1	0	0	0	0	0	0	0	0	0	0	0	2
1	1	53	2	2	2	0	1	1	0	0	0	0	0	0	0	0	0	2
1	1	151	2	2	2	0	0	1	0	0	0	0	0	0	0	0	0	2
1	1	151	2	2	2	1	0	0	0	0	0	0	0	0	0	0	0	2
1	1	129	2	2	2	1	0	0	0	0	0	0	0	0	0	0	0	2
1	1	169	1	2	2	0	0	0	0	0	0	0	0	0	1	1	0	2
1	1	169	2	2	2	1	0	0	0	0	0	0	0	0	0	0	0	2
1	1	169	2	2	2	1	0	0	0	0	0	0	0	0	0	0	0	1
1	1	169	2	2	2	0	0	1	0	0	0	0	0	0	0	0	0	2
1	1	169	2	2	2	1	0	0	0	0	0	0	0	0	0	0	0	2
1	1	169	2	2	2	1	0	0	0	0	0	0	0	0	0	0	0	1
1	1	169	2	2	2	1	0	0	0	0	0	0	0	0	0	0	0	2
1	1	191	1	2	2	0	0	0	0	0	0	1	0	0	0	1	0	2
1	1	151	2	2	2	0	1	0	1	0	0	0	0	0	0	0	0	2
1	1	129	2	2	2	1	0	0	0	0	0	0	0	0	0	0	0	2
1	1	87	1	2	2	1	0	0	0	0	0	0	0	0	0	0	0	1
1	1	151	2	2	2	1	0	0	0	0	0	0	0	0	0	0	0	2
1	1	151	2	2	2	1	0	0	0	0	0	0	0	0	0	0	0	2
1	1	119	2	2	2	0	0	0	0	0	0	0	0	0	0	1	0	2
1	1	151	2	2	2	0	1	0	0	0	0	1	0	0	0	0	0	1
1	1	169	2	2	2	1	0	0	0	0	0	0	0	0	0	0	0	2
1	1	129	2	2	2	0	1	0	0	0	0	0	0	0	0	0	0	2
1	1	129	2	2	2	0	1	0	0	0	0	0	0	0	1	0	1	2
1	1	151	2	2	2	0	0	1	0	0	0	0	0	0	0	0	0	2
1	1	169	2	2	2	0	0	0	0	0	0	0	0	0	0	1	0	1
1	1	151	2	2	2	1	0	0	0	0	0	0	0	0	0	0	0	1
1	1	151	1	2	2	0	1	0	0	0	0	0	0	0	1	0	0	1
1	1	177	2	2	2	1	0	0	0	0	0	0	0	0	0	0	0	2
1	1	13	1	2	2	1	0	0	0	0	0	0	0	0	0	0	0	2
1	1	97	2	2	2	1	0	0	0	0	0	0	0	0	0	0	0	2
1	1	97	2	2	2	1	0	0	0	0	0	0	0	0	0	0	0	2
1	1	177	2	2	2	0	0	1	0	0	0	0	0	0	1	0	0	2
1	1	151	1	2	2	0	0	1	0	0	0	0	0	0	0	0	0	2
1	1	129	2	2	2	1	0	0	0	0	0	0	0	0	0	0	0	2
1	1	53	2	2	2	1	0	0	0	0	0	0	0	0	0	0	0	2
1	1	151	2	2	2	0	0	1	1	0	0	0	0	0	0	0	0	2
1	1	87	2	2	2	0	0	1	1	1	0	0	0	0	0	0	0	1
1	1	151	2	2	2	1	0	0	0	0	0	0	0	0	0	0	0	2
1	1	164	2	2	2	1	0	0	0	0	0	0	0	0	0	0	0	2
1	1	177	2	2	2	1	0	0	0	0	0	0	0	0	0	0	0	1
1	1	31	2	2	2	1	0	0	0	0	0	0	0	0	0	0	0	2
1	1	177	2	2	2	1	0	0	0	0	0	0	0	0	0	0	0	2
1	1	151	2	2	2	1	0	0	0	0	0	0	0	0	0	0	0	2
1	1	164	1	2	2	1	0	0	0	0	0	0	0	0	0	0	0	2
1	1	151	1	2	2	0	0	1	1	0	0	0	0	0	0	0	0	2
1	1	151	2	2	2	1	0	0	0	0	0	0	0	0	0	0	0	2
1	1	93	2	2	2	0	0	0	0	0	0	0	0	0	1	0	0	2
1	1	151	2	2	2	0	1	1	1	0	0	0	0	0	0	0	0	2
1	1	164	2	2	2	1	0	0	0	0	0	0	0	0	0	0	0	2
1	1	164	1	2	2	1	0	0	0	0	0	0	0	0	0	0	0	2
1	1	177	2	2	2	0	1	1	0	0	0	0	0	0	0	0	0	2
1	1	151	2	2	2	1	0	0	0	0	0	0	0	0	0	0	0	2
1	1	177	2	2	2	0	0	1	0	0	0	0	0	0	0	0	0	2
1	1	177	2	2	2	0	1	0	1	0	0	0	0	0	0	0	0	1
1	1	93	2	2	2	0	0	0	0	0	0	1	0	0	1	0	0	1
1	1	93	1	2	2	0	1	0	0	0	0	0	0	0	0	0	0	2
1	1	93	2	2	2	1	0	0	0	0	0	0	0	0	0	0	0	1
1	1	93	2	2	2	0	0	1	0	0	0	0	0	0	0	1	0	1
1	1	177	2	2	2	0	1	0	0	0	0	0	0	0	0	0	0	1
1	1	177	2	2	2	1	0	0	0	0	0	0	0	0	0	0	0	2
1	1	13	2	2	2	0	1	0	0	0	0	0	0	0	0	0	0	1
1	1	93	2	2	2	0	0	0	0	0	0	0	0	0	1	0	0	2
1	1	151	2	2	2	1	0	0	0	0	0	0	0	0	0	0	0	2
1	1	151	1	2	2	1	0	0	0	0	0	0	0	0	0	0	0	2
1	1	177	2	2	2	0	0	0	1	0	0	0	0	0	0	0	0	2
1	1	177	2	2	2	1	0	0	0	0	0	0	0	0	0	0	0	2
1	1	151	2	2	2	0	0	1	0	0	0	0	0	0	0	0	0	1
1	1	151	2	2	2	0	0	0	0	0	0	0	1	0	0	0	0	2
1	1	151	2	2	2	1	0	0	0	0	0	0	0	0	0	0	0	2
1	1	131	2	2	2	1	0	0	0	0	0	0	0	0	0	0	0	2
1	1	151	2	2	2	1	0	0	0	0	0	0	0	0	0	0	0	2
1	1	182	2	2	2	0	0	1	0	1	0	0	0	0	0	0	0	2
1	1	177	2	2	2	1	0	0	0	0	0	0	0	0	0	0	0	2
1	1	151	2	2	2	0	0	1	0	0	0	0	0	0	0	0	0	2
1	1	164	2	2	2	1	0	0	0	0	0	0	0	0	0	0	0	1
1	1	151	2	2	2	1	0	0	0	0	0	0	0	0	0	0	0	2
1	1	151	2	2	2	1	0	0	0	0	0	0	0	0	0	0	0	2
1	1	151	2	2	2	1	0	0	0	0	0	0	0	0	0	0	0	1
1	1	191	2	2	2	0	0	1	0	0	0	0	0	0	0	0	0	2
1	1	151	2	2	2	0	0	0	1	0	0	0	0	0	0	0	0	2
1	1	131	2	2	2	1	0	0	0	0	0	0	0	0	0	0	0	2
1	1	151	2	2	2	1	0	0	0	0	0	0	0	0	0	0	0	1
1	1	182	2	2	2	1	0	0	0	0	0	0	0	0	0	0	0	2
1	1	151	2	2	2	0	1	0	1	0	0	0	0	0	0	0	0	2
1	1	151	2	2	2	0	1	1	0	0	0	0	0	0	0	0	0	2
1	1	182	2	2	2	1	0	0	0	0	0	0	0	0	0	0	0	2
1	1	151	2	2	2	1	0	0	0	0	0	0	0	0	0	0	0	2
1	1	151	2	2	2	0	1	0	0	1	0	0	0	0	1	1	0	2
1	1	151	2	2	2	0	0	1	0	0	0	0	0	0	1	0	0	2
1	1	151	1	2	2	0	1	0	0	0	0	0	0	0	1	0	0	2
1	1	151	2	2	2	0	0	0	1	0	0	0	0	0	0	1	0	2
1	1	62	2	2	2	1	0	0	0	0	0	0	0	0	0	0	0	2
1	1	151	2	2	2	1	0	0	0	0	0	0	0	0	0	0	0	2
1	1	151	2	2	2	1	0	0	0	0	0	0	0	0	0	0	0	2
1	1	151	1	2	2	0	0	1	0	0	0	0	0	0	0	0	0	2
1	1	177	2	2	2	0	0	0	0	0	0	0	0	0	0	1	0	1
1	1	151	2	2	2	1	0	0	0	0	0	0	0	0	0	0	0	1
1	1	53	2	2	2	0	0	0	1	1	0	0	0	0	0	0	0	2
1	1	53	2	2	2	1	0	0	0	0	0	0	0	0	0	0	0	2
1	1	53	2	2	2	1	0	0	0	0	0	0	0	0	0	0	0	2
1	1	53	2	2	2	1	0	0	0	0	0	0	0	0	0	0	0	1
1	1	60	1	2	2	1	0	0	0	0	0	0	0	0	0	0	0	2
1	1	129	2	2	2	0	1	0	0	0	0	0	0	0	0	0	0	2
1	1	151	2	2	2	0	1	0	0	0	0	0	0	0	0	0	0	2
1	1	169	2	2	2	0	1	0	0	0	0	0	0	0	0	0	0	1
1	1	93	2	2	2	0	0	0	0	0	0	0	0	0	0	1	0	1
1	1	93	2	2	2	1	0	0	0	0	0	0	0	0	0	0	0	2
1	1	53	2	2	2	1	0	0	0	0	0	0	0	0	0	0	0	2
1	1	87	1	2	2	1	0	0	0	0	0	0	0	0	0	0	0	1
1	1	169	2	2	2	0	0	0	1	0	0	0	0	0	0	0	0	2
1	1	169	2	2	2	0	1	0	0	0	0	0	0	0	1	0	0	1
1	1	151	2	2	2	1	0	0	0	0	0	0	0	0	0	0	0	2
1	1	53	2	2	2	0	1	0	1	0	0	1	0	0	1	0	1	1
1	1	129	2	2	2	1	0	0	0	0	0	0	0	0	0	0	0	2
1	1	53	2	2	2	1	0	0	0	0	0	0	0	0	0	0	0	2
1	1	151	2	2	2	1	0	0	0	0	0	0	0	0	0	0	0	2
1	1	169	2	2	2	0	1	0	0	0	0	0	0	0	0	0	0	1
1	1	169	2	2	2	1	0	0	0	0	0	0	0	0	0	0	0	1
1	1	169	2	2	2	0	0	1	1	0	0	0	0	0	0	0	0	2
1	1	169	2	2	2	0	1	1	0	0	0	0	0	0	0	0	0	2
1	1	169	2	2	2	0	0	0	1	0	0	0	0	0	0	0	0	2
1	1	169	2	2	2	0	1	1	0	0	0	0	1	0	0	0	0	1
1	1	169	2	2	2	1	0	0	0	0	0	0	0	0	0	0	0	2
1	1	169	2	2	2	1	0	0	0	0	0	0	0	0	0	0	0	2
1	1	169	2	2	2	0	0	0	0	0	0	0	0	0	1	1	0	2
1	1	53	1	2	2	1	0	0	0	0	0	0	0	0	0	0	0	2
1	1	169	2	2	2	0	0	1	0	0	0	0	0	0	0	0	0	2
1	1	169	2	2	2	0	1	1	0	0	0	0	0	0	0	0	0	2
1	1	169	2	2	2	1	0	0	0	0	0	0	0	0	0	0	0	2
1	1	169	2	2	2	1	0	0	0	0	0	0	0	0	0	0	0	2
1	1	169	2	2	2	0	1	1	1	0	0	0	0	1	0	1	0	1
1	1	169	2	2	2	1	0	0	0	0	0	0	0	0	0	0	0	2
1	1	169	2	2	2	0	1	1	1	0	0	0	0	0	0	1	0	1
1	1	169	2	2	2	1	0	0	0	0	0	0	0	0	0	0	0	2
1	1	169	2	2	2	1	0	0	0	0	0	0	0	0	0	0	0	1
1	1	169	2	2	2	1	0	0	0	0	0	0	0	0	0	0	0	1
1	1	169	2	2	2	0	1	1	1	0	0	0	0	0	1	0	0	1
1	1	169	2	2	2	0	1	1	1	0	0	0	0	0	0	0	0	1
1	1	169	2	2	2	0	1	0	0	0	0	0	0	0	0	0	0	1
1	1	169	2	2	2	1	0	0	0	0	0	0	0	0	0	0	0	2
1	1	169	2	2	2	0	0	0	0	0	0	0	0	0	0	1	0	2
1	1	151	2	2	2	1	0	0	0	0	0	0	0	0	0	0	0	2
1	1	169	2	2	2	0	0	1	0	0	0	0	0	0	0	0	0	2
1	1	169	1	2	2	1	0	0	0	0	0	0	0	0	0	0	0	2
1	1	151	2	2	2	1	0	0	0	0	0	0	0	0	0	0	0	2
1	1	151	2	2	2	0	0	0	0	0	0	0	0	0	1	0	0	1
1	1	53	2	2	2	1	0	0	0	0	0	0	0	0	0	0	0	2
1	1	53	2	2	2	1	0	0	0	0	0	0	0	0	0	0	0	2
1	1	53	2	2	2	0	1	0	0	0	0	0	0	0	0	0	0	2
1	1	53	2	2	2	1	0	0	0	0	0	0	0	0	0	0	0	2
1	1	53	2	2	2	1	0	0	0	0	0	0	0	0	0	0	0	2
1	1	53	1	2	2	0	1	0	0	0	0	0	0	0	0	0	0	2
1	1	53	2	2	2	1	0	0	0	0	0	0	0	0	0	0	0	2
1	1	53	2	2	2	0	1	0	0	0	0	0	0	0	0	0	0	1
1	1	164	2	2	2	0	1	0	0	0	0	0	0	0	0	0	0	1
1	1	164	2	2	2	0	1	0	0	0	0	0	0	0	0	0	0	2
1	1	164	2	2	2	0	0	0	0	0	0	0	1	1	0	0	0	1
1	1	151	2	2	2	1	0	0	0	0	0	0	0	0	0	0	0	2
1	1	164	2	2	2	0	0	1	0	0	0	0	0	0	0	0	0	2
1	1	151	2	2	2	1	0	0	0	0	0	0	0	0	0	0	0	2
1	1	66	2	2	2	1	0	0	0	0	0	0	0	0	0	0	0	2
1	1	164	2	2	2	1	0	0	0	0	0	0	0	0	0	0	0	2
1	1	151	2	2	2	0	1	1	0	0	0	0	0	0	0	0	0	2
1	1	151	2	2	2	1	0	0	0	0	0	0	0	0	0	0	0	2
1	1	93	2	2	2	0	1	1	1	0	0	0	0	0	1	0	0	2
1	1	151	2	2	2	1	0	0	0	0	0	0	0	0	0	0	0	2
1	1	131	2	2	2	0	0	1	0	0	0	0	0	0	0	0	0	2
1	1	93	2	2	2	1	0	0	0	0	0	0	0	0	0	0	0	2
1	1	164	2	2	2	1	0	0	0	0	0	0	0	0	0	0	0	1
1	1	53	2	2	2	1	0	0	0	0	0	0	0	0	0	0	0	1
1	1	93	2	2	2	1	0	0	0	0	0	0	0	0	0	0	0	2
1	1	53	2	2	2	1	0	0	0	0	0	0	0	0	0	0	0	1
1	1	53	2	2	2	0	0	0	1	0	0	0	0	0	0	0	0	1
1	1	93	2	2	2	0	0	0	0	0	0	0	0	0	1	0	0	1
1	1	93	2	2	2	1	0	0	0	0	0	0	0	0	0	0	0	2
1	1	93	2	2	2	0	0	1	1	0	0	0	0	0	0	0	0	2
1	1	93	2	2	2	1	0	0	0	0	0	0	0	0	0	0	0	2
1	1	93	1	2	2	1	0	0	0	0	0	0	0	0	0	0	0	2
1	1	53	2	2	2	0	1	0	0	0	0	0	0	0	0	0	0	1
1	1	93	2	2	2	0	0	0	1	0	0	0	0	0	0	0	0	2
1	1	93	1	2	2	0	1	1	0	0	0	0	0	0	0	0	0	2
1	1	93	2	2	2	0	1	0	0	0	0	0	0	0	1	1	0	1
1	1	93	2	2	2	1	0	0	0	0	0	0	0	0	0	0	0	2
1	1	87	2	2	2	1	0	0	0	0	0	0	0	0	0	0	0	2
1	1	53	2	2	2	1	0	0	0	0	0	0	0	0	0	0	0	1
1	1	93	2	2	2	1	0	0	0	0	0	0	0	0	0	0	0	2
1	1	87	2	2	2	0	0	1	0	0	0	0	0	0	0	0	0	2
1	1	93	2	2	2	0	0	1	0	0	0	0	0	0	0	0	0	1
1	1	106	2	2	2	1	0	0	0	0	0	0	0	0	0	0	0	2
1	1	53	2	2	2	0	1	0	0	0	0	0	0	0	0	0	0	2
1	1	93	2	2	2	0	0	1	0	0	0	0	0	0	0	0	0	2
1	1	131	2	2	2	0	0	0	1	1	0	0	0	0	0	0	0	2
1	1	93	2	2	2	0	0	0	1	0	0	0	0	0	0	0	0	2
1	1	93	2	2	2	1	0	0	0	0	0	0	0	0	0	0	0	2
1	1	151	2	2	2	1	0	0	0	0	0	0	0	0	0	0	0	2
1	1	53	2	2	2	0	0	0	1	0	0	0	0	0	0	0	0	2
1	1	53	2	2	2	1	0	0	0	0	0	0	0	0	0	0	0	2
1	1	93	2	2	2	0	1	0	0	0	0	0	0	0	0	0	0	1
1	1	93	2	2	2	1	0	0	0	0	0	0	0	0	0	0	0	2
1	1	93	2	2	2	0	0	0	0	0	0	0	0	1	1	0	0	2
1	1	93	2	2	2	1	0	0	0	0	0	0	0	0	0	0	0	2
1	1	93	2	2	2	0	0	1	0	0	0	0	0	0	0	0	0	2
1	1	93	2	2	2	1	0	0	0	0	0	0	0	0	0	0	0	1
1	1	93	2	2	2	1	0	0	0	0	0	0	0	0	0	0	0	2
1	1	93	2	2	2	0	0	1	0	0	0	0	0	0	0	0	0	2
1	1	82	2	2	2	0	1	0	0	0	0	0	0	0	0	1	0	1
1	1	93	2	2	2	0	1	0	0	0	0	0	0	0	0	0	0	2
1	1	151	2	2	2	0	1	0	0	0	0	0	0	0	1	0	0	2
1	1	93	2	2	2	0	1	0	0	0	0	0	0	0	0	0	0	1
1	1	93	2	2	2	0	1	0	0	0	0	0	0	0	0	0	0	2
1	1	53	2	2	2	0	1	1	0	0	0	0	0	0	0	0	0	1
1	1	93	2	2	2	0	1	1	0	0	0	0	0	0	0	0	0	2
1	1	93	2	2	2	0	0	0	0	0	0	0	0	0	0	1	0	2
1	1	53	2	2	2	0	1	1	0	0	0	0	0	0	0	0	0	2
1	1	93	2	2	2	1	0	0	0	0	0	0	0	0	0	0	0	1
1	1	93	2	2	2	1	0	0	0	0	0	0	0	0	0	0	0	2
1	1	93	1	2	2	0	0	1	0	0	0	0	0	0	0	0	0	1
1	1	93	2	2	2	1	0	0	0	0	0	0	0	0	0	0	0	2
1	1	93	1	2	2	0	0	1	0	1	1	1	0	0	1	0	0	1
1	1	53	1	2	2	0	1	0	0	0	0	0	0	0	0	0	0	2
1	1	93	2	2	2	0	1	1	0	1	0	0	0	0	0	0	0	2
1	1	87	2	2	2	1	0	0	0	0	0	0	0	0	0	0	0	2
1	1	93	2	2	2	1	0	0	0	0	0	0	0	0	0	0	0	1
1	1	53	2	2	2	0	1	0	0	0	0	0	0	0	0	0	0	1
1	1	53	2	2	2	0	0	1	0	0	0	0	0	0	0	0	0	1
1	1	53	2	2	2	0	1	1	0	0	0	0	0	0	0	0	0	2
1	1	151	2	2	2	0	1	1	0	0	0	0	0	0	0	0	0	2
1	1	53	2	2	2	1	0	0	0	0	0	0	0	0	0	0	0	2
1	1	93	2	2	2	1	0	0	0	0	0	0	0	0	0	0	0	2
1	1	93	2	2	2	0	1	1	1	0	0	0	0	0	0	0	0	2
1	1	93	2	2	2	0	1	1	0	0	0	0	0	0	0	0	0	2
1	1	81	2	2	2	1	0	0	0	0	0	0	0	0	0	0	0	2
1	1	93	2	2	2	0	0	1	0	0	0	0	0	0	0	0	0	2
1	1	93	2	2	2	0	0	1	1	0	0	0	0	0	1	1	0	1
1	1	93	2	2	2	0	1	1	0	0	0	0	1	0	1	0	0	1
1	1	93	2	2	2	0	1	0	1	0	0	0	0	0	0	0	0	2
1	1	93	2	2	2	1	0	0	0	0	0	0	0	0	0	0	0	2
1	1	93	2	2	2	1	0	0	0	0	0	0	0	0	0	0	0	2
1	1	93	2	2	2	0	0	0	0	0	0	0	0	0	1	0	0	1
1	1	151	2	2	2	0	1	0	0	1	0	0	0	0	0	0	0	1
1	1	184	2	2	2	0	0	1	1	0	0	0	0	0	0	0	0	2
1	1	93	2	2	2	1	0	0	0	0	0	0	0	0	0	0	0	2
1	1	93	2	2	2	1	0	0	0	0	0	0	0	0	0	0	0	2
1	1	93	2	2	2	1	0	0	0	0	0	0	0	0	0	0	0	2
1	1	87	2	2	2	1	0	0	0	0	0	0	0	0	0	0	0	1
1	1	93	2	2	2	1	0	0	0	0	0	0	0	0	0	0	0	2
1	1	106	2	2	2	1	0	0	0	0	0	0	0	0	0	0	0	2
1	1	93	1	2	2	1	0	0	0	0	0	0	0	0	0	0	0	1
1	1	151	2	2	2	0	1	0	0	0	0	0	0	0	0	0	0	2
1	1	93	2	2	2	1	0	0	0	0	0	0	0	0	0	0	0	1
1	1	93	2	2	2	1	0	0	0	0	0	0	0	0	0	0	0	2
1	1	93	2	2	2	1	0	0	0	0	0	0	0	0	0	0	0	2
1	1	93	1	2	2	0	1	0	1	0	0	0	0	0	0	0	0	2
1	1	93	2	2	2	0	0	0	1	0	0	0	0	0	0	0	0	2
1	1	93	2	2	2	0	0	1	1	0	0	0	0	0	0	0	0	1
1	1	93	2	2	2	1	0	0	0	0	0	0	0	0	0	0	0	2
1	1	93	2	2	2	0	1	0	0	0	0	0	0	0	0	0	0	1
1	1	93	1	2	2	0	1	0	0	0	0	0	0	0	0	0	0	1
1	1	97	2	2	2	0	1	1	0	0	0	0	0	0	0	0	0	2
1	1	93	1	2	2	0	1	0	0	0	0	0	0	0	1	0	0	1
1	1	93	1	2	2	1	0	0	0	0	0	0	0	0	0	0	0	2
1	1	93	2	2	2	0	0	1	0	0	0	0	0	0	0	0	0	2
1	1	93	2	2	2	0	1	0	1	0	0	0	0	0	0	0	0	2
1	1	93	2	2	2	0	0	1	0	0	0	0	0	0	0	0	0	2
1	1	93	2	2	2	0	0	1	0	0	0	0	0	0	0	0	0	2
1	1	93	2	2	2	1	0	0	0	0	0	0	0	0	0	0	0	2
1	1	93	2	2	2	1	0	0	0	0	0	0	0	0	0	0	0	2
1	1	53	2	2	2	1	0	0	0	0	0	0	0	0	0	0	0	2
1	1	93	2	2	2	0	1	0	0	0	0	0	0	0	1	0	0	2
1	1	93	2	2	2	0	1	1	1	0	0	0	0	0	1	1	0	2
1	1	93	2	2	2	0	1	0	0	0	0	0	0	0	0	0	0	1
1	1	53	2	2	2	0	1	0	0	0	0	0	0	0	0	0	0	2
1	1	53	2	2	2	1	0	0	0	0	0	0	0	0	0	0	0	2
1	1	53	2	2	2	1	0	0	0	0	0	0	0	0	0	0	0	1
1	1	93	1	2	2	0	0	1	0	0	0	0	0	0	0	0	0	2
1	1	93	2	2	2	1	0	0	0	0	0	0	0	0	0	0	0	2
1	1	53	2	2	2	0	0	0	1	0	0	0	0	0	0	0	0	1
1	1	93	2	2	2	1	0	0	0	0	0	0	0	0	0	0	0	2
1	1	93	2	2	2	1	0	0	0	0	0	0	0	0	0	0	0	1
1	1	93	1	2	2	0	0	1	0	0	0	0	0	0	0	0	0	2
1	1	93	2	2	2	0	1	0	0	0	0	0	0	0	0	0	0	1
1	1	93	1	2	2	1	0	0	0	0	0	0	0	0	0	0	0	2
1	1	182	2	2	2	1	0	0	0	0	0	0	0	0	0	0	0	2
1	1	93	2	2	2	0	1	0	0	0	0	0	0	0	0	1	0	1
1	1	93	2	2	2	0	1	0	0	0	0	0	0	0	0	0	0	2
1	1	93	2	2	2	1	0	0	0	0	0	0	0	0	0	0	0	2
1	1	93	2	2	2	1	0	0	0	0	0	0	0	0	0	0	0	2
1	1	53	2	2	2	0	1	0	0	0	0	0	1	0	0	0	0	2
1	1	53	2	2	2	1	0	0	0	0	0	0	0	0	0	0	0	2
1	1	53	2	2	2	1	0	0	0	0	0	0	0	0	0	0	0	2
1	1	93	2	2	2	0	0	0	1	0	0	0	0	0	0	0	0	1
1	1	183	2	2	2	0	0	1	1	0	0	0	0	0	0	0	0	2
1	1	93	2	2	2	0	0	1	0	0	0	0	0	0	0	0	0	2
1	1	93	2	2	2	0	0	1	0	0	0	0	0	0	0	0	0	2
1	1	31	1	2	2	1	0	0	0	0	0	0	0	0	0	0	0	1
1	1	53	2	2	2	0	0	0	1	0	0	0	0	0	0	0	0	2
1	1	93	2	2	2	1	0	0	0	0	0	0	0	0	0	0	0	2
1	1	93	2	2	2	1	0	0	0	0	0	0	0	0	0	0	0	1
1	1	93	2	2	2	1	0	0	0	0	0	0	0	0	0	0	0	2
1	1	93	2	2	2	0	0	1	0	0	0	0	0	0	0	0	0	1
1	1	93	2	2	2	0	0	0	1	0	0	0	0	0	0	0	0	1
1	1	93	2	2	2	0	1	1	0	0	0	0	0	0	0	0	0	2
1	1	93	1	2	2	0	0	0	1	0	0	0	0	0	0	0	0	2
1	1	93	2	2	2	0	1	0	0	0	0	0	0	0	0	0	0	1
1	1	93	1	2	2	0	1	0	1	0	0	0	0	0	1	0	0	1
1	1	53	2	2	2	0	0	1	0	0	1	0	0	0	1	1	0	2
1	1	164	2	2	2	0	0	0	0	0	0	0	0	0	0	1	0	1
1	1	93	2	2	2	1	0	0	0	0	0	0	0	0	0	0	0	2
1	1	93	2	2	2	0	1	0	0	0	0	0	0	0	0	0	0	1
1	1	93	2	2	2	0	1	0	1	0	0	0	0	0	0	0	0	1
1	1	93	2	2	2	1	0	0	0	0	0	0	0	0	0	0	0	1
1	1	93	2	2	2	1	0	0	0	0	0	0	0	0	0	0	0	2
1	1	93	2	2	2	1	0	0	0	0	0	0	0	0	0	0	0	2
1	1	93	2	2	2	1	0	0	0	0	0	0	0	0	0	0	0	2
1	1	93	1	2	2	0	1	0	0	0	0	0	0	0	0	0	0	2
1	1	93	2	2	2	0	1	0	1	0	0	0	0	0	0	0	0	1
1	1	93	2	2	2	0	0	1	0	0	0	0	0	0	0	0	0	2
1	1	93	2	2	2	0	0	0	1	0	0	0	0	0	0	0	0	1
1	1	93	2	2	2	1	0	0	0	0	0	0	0	0	0	0	0	1
1	1	93	2	2	2	0	1	0	0	0	0	0	0	0	0	0	0	2
1	1	93	2	2	2	1	0	0	0	0	0	0	0	0	0	0	0	2
1	1	93	2	2	2	0	0	1	0	0	0	0	0	0	0	0	0	2
1	1	93	2	2	2	0	1	0	1	0	0	0	0	0	1	0	0	1
1	1	93	2	2	2	1	0	0	0	0	0	0	0	0	0	0	0	2
1	1	93	2	2	2	1	0	0	0	0	0	0	0	0	0	0	0	2
1	1	93	2	2	2	0	0	0	1	0	0	0	0	0	0	0	0	2
1	1	93	2	2	2	0	1	0	0	0	0	1	0	0	0	1	0	2
1	1	93	2	2	2	0	0	0	0	0	0	0	0	0	0	1	0	1
1	1	81	2	2	2	0	0	1	1	0	0	0	0	0	0	0	0	1
1	1	93	2	2	2	1	0	0	0	0	0	0	0	0	0	0	0	2
1	1	93	2	2	2	0	0	0	1	0	0	0	0	0	0	0	0	2
1	1	9	2	2	2	1	0	0	0	0	0	0	0	0	0	0	0	2
1	1	53	2	2	2	0	0	1	0	0	0	0	0	0	0	0	0	1
1	1	93	1	2	2	0	0	0	0	0	0	0	1	0	0	0	0	1
1	1	93	2	2	2	0	0	0	1	0	0	0	0	0	0	0	0	2
1	1	53	1	2	2	0	1	0	0	0	0	0	0	0	0	1	0	2
1	1	93	2	2	2	1	0	0	0	0	0	0	0	0	0	0	0	2
1	1	93	2	2	2	1	0	0	0	0	0	0	0	0	0	0	0	2
1	1	93	2	2	2	1	0	0	0	0	0	0	0	0	0	0	0	2
1	1	93	1	2	2	1	0	0	0	0	0	0	0	0	0	0	0	2
1	1	93	1	2	2	0	0	0	0	0	0	0	0	0	1	1	0	2
1	1	93	1	2	2	1	0	0	0	0	0	0	0	0	0	0	0	2
1	1	31	2	2	2	0	1	0	0	0	0	0	0	0	0	0	0	2
1	1	93	2	2	2	0	1	0	1	0	0	0	0	0	0	0	0	1
1	1	53	1	2	2	1	0	0	0	0	0	0	0	0	0	0	0	2
1	1	93	2	2	2	1	0	0	0	0	0	0	0	0	0	0	0	2
1	1	93	2	2	2	0	1	0	0	0	0	0	0	0	0	0	0	2
1	1	184	2	2	2	1	0	0	0	0	0	0	0	0	0	0	0	2
1	1	93	2	2	2	1	0	0	0	0	0	0	0	0	0	0	0	2
1	1	93	1	2	2	1	0	0	0	0	0	0	0	0	0	0	0	2
1	1	151	1	2	2	0	0	0	0	0	0	0	1	0	0	0	0	2
1	1	93	2	2	2	1	0	0	0	0	0	0	0	0	0	0	0	2
1	1	151	2	2	2	0	0	1	0	0	0	0	0	0	0	0	0	2
1	1	93	1	2	2	1	0	0	0	0	0	0	0	0	0	0	0	2
1	1	93	2	2	2	0	0	0	1	0	0	0	0	1	0	0	0	1
1	1	3	1	2	2	0	1	1	1	0	0	0	1	0	0	1	0	2
1	1	93	2	2	2	0	1	0	0	0	0	0	0	0	0	0	0	1
1	1	93	2	2	2	1	0	0	0	0	0	0	0	0	0	0	0	1
1	1	53	2	2	2	0	0	1	0	0	0	0	0	0	0	0	0	2
1	1	93	1	2	2	1	0	0	0	0	0	0	0	0	0	0	0	2
1	1	183	2	2	2	0	1	0	0	0	0	0	0	0	0	0	0	2
1	1	93	2	2	2	0	0	0	1	0	0	0	0	0	0	0	0	2
1	1	93	2	2	2	0	1	0	1	0	0	0	0	0	0	0	0	2
1	1	106	2	2	2	0	0	0	1	0	0	0	0	0	0	0	0	2
1	1	93	2	2	2	0	1	0	0	0	0	0	0	0	0	0	0	2
1	1	93	2	2	2	0	0	0	0	0	0	0	0	0	1	0	0	2
1	1	93	2	2	2	1	0	0	0	0	0	0	0	0	0	0	0	2
1	1	93	1	2	2	1	0	0	0	0	0	0	0	0	0	0	0	1
1	1	93	2	2	2	1	0	0	0	0	0	0	0	0	0	0	0	2
1	1	81	2	2	2	1	0	0	0	0	0	0	0	0	0	0	0	2
1	1	93	2	2	2	0	1	0	0	0	0	0	0	0	1	0	0	2
1	1	93	2	2	2	1	0	0	0	0	0	0	0	0	0	0	0	2
1	1	93	2	2	2	0	1	1	0	0	0	0	0	0	0	0	0	2
1	1	93	1	2	2	0	0	1	0	0	0	0	0	0	0	0	0	2
1	1	53	2	2	2	0	0	0	0	0	0	0	0	1	0	0	0	2
1	1	93	2	2	2	0	0	1	0	0	0	0	0	0	0	0	0	2
1	1	93	2	2	2	0	1	0	0	0	0	0	0	0	0	0	0	1
1	1	93	2	2	2	0	0	1	0	0	0	0	0	0	0	0	0	2
1	1	93	2	2	2	1	0	0	0	0	0	0	0	0	0	0	0	2
1	1	184	2	2	2	0	1	1	0	0	0	0	1	0	0	0	0	2
1	1	93	2	2	2	0	0	0	1	0	0	0	0	0	0	0	0	2
1	1	93	2	2	2	1	0	0	0	0	0	0	0	0	0	0	0	2
1	1	151	2	2	2	1	0	0	0	0	0	0	0	0	0	0	0	2
1	1	93	2	2	2	1	0	0	0	0	0	0	0	0	0	0	0	2
1	1	93	2	2	2	0	0	0	0	0	0	0	0	0	1	0	0	2
1	1	93	2	2	2	0	1	0	0	0	0	0	0	0	0	0	0	2
1	1	93	2	2	2	1	0	0	0	0	0	0	0	0	0	0	0	2
1	1	93	1	2	2	0	0	1	0	0	0	0	0	0	0	0	0	2
1	1	93	2	2	2	0	1	0	0	0	0	0	0	0	0	0	0	2
1	1	164	2	2	2	0	1	0	0	0	0	0	0	0	0	0	0	2
1	1	53	2	2	2	1	0	0	0	0	0	0	0	0	0	0	0	2
1	1	129	2	2	2	1	0	0	0	0	0	0	0	0	0	0	0	2
1	1	151	2	2	2	0	0	0	0	1	0	0	0	0	0	0	0	2
1	1	169	2	2	2	1	0	0	0	0	0	0	0	0	0	0	0	2
1	1	151	2	2	2	0	1	1	0	0	0	0	0	0	0	0	0	2
1	1	93	2	2	2	1	0	0	0	0	0	0	0	0	0	0	0	2
1	1	93	2	2	2	0	1	0	0	0	0	0	0	0	0	0	0	2
1	1	53	2	2	2	1	0	0	0	0	0	0	0	0	0	0	0	2
1	1	93	2	2	2	1	0	0	0	0	0	0	0	0	0	0	0	1
1	1	17	2	2	2	1	0	0	0	0	0	0	0	0	0	0	0	1
1	1	93	2	2	2	0	1	1	0	0	0	0	0	0	0	0	0	2
1	1	93	2	2	2	1	0	0	0	0	0	0	0	0	0	0	0	2
1	1	93	2	2	2	0	1	1	0	0	0	0	0	0	0	0	0	2
1	1	93	2	2	2	1	0	0	0	0	0	0	0	0	0	0	0	2
1	1	151	2	2	2	0	1	0	0	0	0	1	0	0	1	1	0	1
1	1	81	2	2	2	0	0	0	1	0	0	0	0	0	0	0	0	2
1	1	93	2	2	2	0	0	1	0	0	0	0	0	0	0	0	0	1
1	1	81	1	2	2	1	0	0	0	0	0	0	0	0	0	0	0	1
1	1	81	2	2	2	0	0	1	0	0	0	0	0	0	0	0	0	2
1	1	81	2	2	2	0	0	1	0	0	0	0	0	0	0	1	0	2
1	1	81	2	2	2	0	1	0	1	0	0	0	0	0	0	1	0	1
1	1	93	1	2	2	0	0	1	0	0	0	0	0	0	0	0	0	2
1	1	151	2	2	2	0	1	1	1	0	0	0	0	0	0	0	0	1
1	1	81	2	2	2	0	1	0	0	0	0	0	0	0	0	0	0	1
1	1	81	2	2	2	0	1	0	0	0	0	0	0	0	0	0	0	1
1	1	93	2	2	2	0	1	0	0	0	0	0	0	0	0	0	0	2
1	1	81	2	2	2	0	1	1	1	0	0	0	0	0	0	0	0	2
1	1	81	1	2	2	0	0	0	1	0	0	0	0	0	0	0	0	2
1	1	53	1	2	2	0	0	1	0	0	0	0	0	0	1	0	0	2
1	1	93	2	2	2	1	0	0	0	0	0	0	0	0	0	0	0	2
1	1	93	2	2	2	1	0	0	0	0	0	0	0	0	0	0	0	2
1	1	81	2	2	2	1	0	0	0	0	0	0	0	0	0	0	0	2
1	1	53	2	2	2	0	1	0	1	0	0	0	0	0	0	0	0	2
1	1	106	2	2	2	1	0	0	0	0	0	0	0	0	0	0	0	2
1	1	53	2	2	2	1	0	0	0	0	0	0	0	0	0	0	0	2
1	1	53	2	2	2	0	0	0	0	0	0	1	0	0	0	1	0	2
1	1	151	2	2	2	1	0	0	0	0	0	0	0	0	0	0	0	2
1	1	151	2	2	2	1	0	0	0	0	0	0	0	0	0	0	0	2
1	1	151	2	2	2	1	0	0	0	0	0	0	0	0	0	0	0	2
1	1	151	2	2	2	0	1	0	1	0	0	0	0	0	0	0	0	2
1	1	151	2	2	2	1	0	0	0	0	0	0	0	0	0	0	0	2
1	1	151	2	2	2	0	0	1	0	0	0	0	0	0	0	0	0	2
1	1	151	1	2	2	0	1	0	0	0	0	0	0	0	0	0	0	1
1	1	151	1	2	2	0	0	1	0	0	0	0	0	0	0	0	0	2
1	1	151	1	2	2	0	0	0	0	0	0	0	0	0	0	1	0	1
1	1	151	2	2	2	0	0	1	0	0	0	0	0	0	0	0	0	2
1	1	53	2	2	2	0	1	0	0	0	0	0	0	0	0	0	0	1
1	1	151	2	2	2	0	0	0	0	0	1	0	0	0	0	0	0	2
1	1	151	2	2	2	1	0	0	0	0	0	0	0	0	0	0	0	1
1	1	151	2	2	2	0	1	0	1	0	0	0	0	0	1	1	0	2
1	1	151	2	2	2	0	1	0	0	0	0	0	0	0	0	0	0	2
1	1	151	2	2	2	0	1	0	0	0	0	0	0	0	1	0	0	2
1	1	151	1	2	2	0	1	1	1	0	0	0	0	0	0	0	0	2
1	1	151	2	2	2	1	0	0	0	0	0	0	0	0	0	0	0	1
1	1	151	2	2	2	1	0	0	0	0	0	0	0	0	0	0	0	2
1	1	53	2	2	2	0	1	1	0	0	0	0	0	0	0	0	0	2
1	1	151	2	2	2	0	1	0	0	0	0	0	0	0	0	0	0	2
1	1	151	1	2	2	1	0	0	0	0	0	0	0	0	0	0	0	2
1	1	151	2	2	2	0	1	0	0	0	0	0	1	0	0	0	0	1
1	1	53	2	2	2	1	0	0	0	0	0	0	0	0	0	0	0	2
1	1	183	2	2	2	0	0	1	0	0	0	0	0	0	0	0	0	2
1	1	53	2	2	2	1	0	0	0	0	0	0	0	0	0	0	0	2
1	1	151	1	2	2	1	0	0	0	0	0	0	0	0	0	0	0	2
1	1	151	2	2	2	1	0	0	0	0	0	0	0	0	0	0	0	2
1	1	151	2	2	2	1	0	0	0	0	0	0	0	0	0	0	0	2
1	1	151	2	2	2	0	0	0	1	0	0	0	0	0	0	0	0	2
1	1	151	2	2	2	1	0	0	0	0	0	0	0	0	0	0	0	1
1	1	151	2	2	2	0	1	0	1	0	0	0	0	0	0	0	0	1
1	1	151	2	2	2	0	0	0	0	0	0	0	0	0	1	0	0	2
1	1	60	2	2	2	0	0	1	0	0	0	0	0	0	0	0	0	2
1	1	151	1	2	2	0	0	1	1	0	0	0	0	0	0	0	0	2
1	1	151	2	2	2	0	0	0	1	0	0	0	0	0	0	0	0	2
1	1	184	2	2	2	1	0	0	0	0	0	0	0	0	0	0	0	2
1	1	151	2	2	2	1	0	0	0	0	0	0	0	0	0	0	0	2
1	1	151	1	2	2	0	1	1	0	0	0	1	0	0	0	1	0	1
1	1	151	2	2	2	1	0	0	0	0	0	0	0	0	0	0	0	2
1	1	164	2	2	2	1	0	0	0	0	0	0	0	0	0	0	0	2
1	1	151	2	2	2	1	0	0	0	0	0	0	0	0	0	0	0	1
1	1	151	2	2	2	1	0	0	0	0	0	0	0	0	0	0	0	2
1	1	151	2	2	2	0	0	1	0	0	0	0	0	0	0	0	0	2
1	1	151	2	2	2	1	0	0	0	0	0	0	0	0	0	0	0	2
1	1	151	1	2	2	0	0	0	0	0	0	0	0	0	1	0	0	2
1	1	151	2	2	2	0	0	0	0	0	0	0	1	0	0	0	0	1
1	1	151	2	2	2	1	0	0	0	0	0	0	0	0	0	0	0	2
1	1	151	2	2	2	0	0	0	0	0	0	0	0	1	0	0	0	2
1	1	81	2	2	2	1	0	0	0	0	0	0	0	0	0	0	0	2
1	1	81	2	2	2	1	0	0	0	0	0	0	0	0	0	0	0	2
1	1	119	1	2	2	1	0	0	0	0	0	0	0	0	0	0	0	2
1	1	151	2	2	2	0	1	0	0	0	0	0	0	0	0	0	0	1
1	1	151	2	2	2	1	0	0	0	0	0	0	0	0	0	0	0	2
1	1	151	2	2	2	1	0	0	0	0	0	0	0	0	0	0	0	2
1	1	151	2	2	2	0	1	0	0	0	0	0	0	0	0	0	0	1
1	1	151	1	2	2	0	0	1	0	0	0	0	0	0	0	0	0	2
1	1	151	2	2	2	1	0	0	0	0	0	0	0	0	0	0	0	2
1	1	151	2	2	2	1	0	0	0	0	0	0	0	0	0	0	0	1
1	1	151	2	2	2	0	1	0	1	0	0	1	0	0	1	1	0	2
1	1	151	2	2	2	0	1	0	0	0	0	0	0	0	0	0	0	2
1	1	53	1	2	2	1	0	0	0	0	0	0	0	0	0	0	0	2
1	1	191	2	2	2	1	0	0	0	0	0	0	0	0	0	0	0	2
1	1	151	2	2	2	0	0	0	0	0	0	0	0	0	0	1	0	2
1	1	161	2	2	2	1	0	0	0	0	0	0	0	0	0	0	0	2
1	1	151	2	2	2	1	0	0	0	0	0	0	0	0	0	0	0	2
1	1	177	2	2	2	1	0	0	0	0	0	0	0	0	0	0	0	2
1	1	169	1	2	2	0	1	0	1	0	0	0	0	0	1	0	0	1
1	1	177	2	2	2	1	0	0	0	0	0	0	0	0	0	0	0	2
1	1	151	2	2	2	1	0	0	0	0	0	0	0	0	0	0	0	2
1	1	182	2	2	2	1	0	1	0	0	0	0	0	0	0	0	0	2
1	1	151	2	2	2	1	0	0	0	0	0	0	0	0	0	0	0	2
1	1	151	2	2	2	0	1	1	1	1	1	1	1	1	1	1	0	1
1	1	182	2	2	2	0	1	1	0	0	0	0	0	0	0	0	0	2
1	1	151	2	2	2	0	0	1	0	0	0	0	0	0	0	0	0	2
1	1	177	2	2	2	0	0	1	0	0	0	1	0	0	1	1	0	2
1	1	151	2	2	2	0	0	0	0	0	0	0	0	0	1	0	0	2
1	1	151	2	2	2	0	1	0	0	1	0	1	0	0	1	1	0	2
1	1	151	1	2	2	1	0	0	0	0	0	0	0	0	0	0	0	2
1	1	151	2	2	2	0	0	1	0	0	0	0	0	0	0	0	0	2
1	1	151	1	2	2	1	0	0	0	0	0	0	0	0	0	0	0	2
1	1	151	2	2	2	0	1	0	0	0	0	0	0	0	0	0	0	2
1	1	151	1	2	2	0	0	1	0	0	0	0	0	0	0	0	0	2
1	1	151	1	2	2	1	0	0	0	0	0	0	0	0	0	0	0	1
1	1	151	2	2	2	1	0	0	0	0	0	0	0	0	0	0	0	2
1	1	151	1	2	2	0	1	0	1	0	0	0	0	0	0	0	0	2
1	1	151	2	2	2	1	0	0	0	0	0	0	0	0	0	0	0	2
1	1	151	2	2	2	0	0	1	0	0	0	0	0	0	0	0	0	2
1	1	151	1	2	2	1	0	0	0	0	0	0	0	0	0	0	0	2
1	1	151	1	2	2	0	1	0	1	0	0	0	0	0	0	0	0	1
1	1	151	2	2	2	1	0	0	0	0	0	0	0	0	0	0	0	1
1	1	151	2	2	2	1	0	0	0	0	0	0	0	0	0	0	0	2
1	1	151	2	2	2	0	0	1	1	0	0	0	0	0	1	0	0	2
1	1	151	2	2	2	1	0	0	0	0	0	0	0	0	0	0	0	2
1	1	151	2	2	2	0	1	1	1	1	0	0	0	1	1	1	0	1
1	1	151	1	2	2	0	1	0	1	0	0	0	0	0	0	1	0	2
1	1	151	2	2	2	0	0	0	1	0	0	0	0	0	0	0	0	2
1	1	151	1	2	2	1	0	0	0	0	0	0	0	0	0	0	0	2
1	1	151	2	2	2	1	0	0	0	0	0	0	0	0	0	0	0	2
1	1	151	2	2	2	0	0	0	1	0	0	0	0	0	0	0	0	2
1	1	151	1	2	2	1	0	0	0	0	0	0	0	0	0	0	0	2
1	1	151	2	2	2	1	0	0	0	0	0	0	0	0	0	0	0	2
1	1	151	1	2	2	1	0	0	0	0	0	0	0	0	0	0	0	2
1	1	151	1	2	2	0	0	1	0	0	0	0	0	0	0	0	0	2
1	1	151	2	2	2	0	1	1	0	1	0	0	0	0	0	0	0	2
1	1	151	2	2	2	1	0	0	0	0	0	0	0	0	0	0	0	2
1	1	151	1	2	2	1	0	0	0	0	0	0	0	0	0	0	0	1
1	1	151	2	2	2	0	0	1	0	0	0	0	0	0	0	0	0	2
1	1	151	2	2	2	1	0	0	0	0	0	0	0	0	0	0	0	2
1	1	151	2	2	2	1	0	0	0	0	0	0	0	0	0	0	0	2
1	1	151	2	2	2	0	0	1	0	0	0	0	0	0	0	0	0	2
1	1	151	2	2	2	1	0	0	0	0	0	0	0	0	0	0	0	2
1	1	191	2	2	2	0	1	0	0	0	0	1	0	0	0	0	0	1
1	1	151	1	2	2	1	0	0	0	0	0	0	0	0	0	0	0	2
1	1	151	1	2	2	0	1	0	1	0	0	1	0	0	1	1	0	2
1	1	151	2	2	2	0	1	1	0	0	0	0	0	0	0	0	0	2
1	1	151	1	2	2	0	1	0	0	0	0	0	0	0	0	0	0	1
1	1	151	2	2	2	0	0	0	1	0	0	0	0	1	0	0	0	1
1	1	151	1	2	2	0	1	1	1	0	0	0	0	0	0	0	0	1
1	1	151	2	2	2	1	0	0	0	0	0	0	0	0	0	0	0	2
1	1	151	2	2	2	1	0	0	0	0	0	0	0	0	0	0	0	2
1	1	151	2	2	2	0	0	0	1	0	0	0	0	0	0	0	0	2
1	1	151	2	2	2	0	0	0	0	1	0	1	0	0	0	0	0	2
1	1	151	2	2	2	1	0	0	0	0	0	0	0	0	0	0	0	2
1	1	151	2	2	2	1	0	0	0	0	0	0	0	0	0	0	0	1
1	1	151	2	2	2	1	0	0	0	0	0	0	0	0	0	0	0	1
1	1	151	1	2	2	1	0	0	0	0	0	0	0	0	0	0	0	2
1	1	151	2	2	2	0	1	1	0	0	0	0	0	0	0	0	0	2
1	1	151	2	2	2	0	1	1	0	0	0	0	0	0	0	0	0	1
1	1	151	2	2	2	1	0	0	0	0	0	0	0	0	0	0	0	1
1	1	151	2	2	2	1	0	0	0	0	0	0	0	0	0	0	0	2
1	1	151	2	2	2	1	0	0	0	0	0	0	0	0	0	0	0	2
1	1	151	2	2	2	1	0	0	0	0	0	0	0	0	0	0	0	2
1	1	151	2	2	2	1	0	0	0	0	0	0	0	0	0	0	0	1
1	1	151	2	2	2	0	1	0	0	0	0	1	0	0	1	0	0	1
1	1	151	2	2	2	1	0	0	0	0	0	0	0	0	0	0	0	2
1	1	151	2	2	2	0	1	0	0	0	0	0	0	0	0	0	0	2
1	1	151	2	2	2	1	0	0	0	0	0	0	0	0	0	0	0	1
1	1	151	2	2	2	1	0	0	0	0	0	0	0	0	0	0	0	2
1	1	151	2	2	2	0	0	1	0	0	0	0	0	0	0	0	0	2
1	1	151	1	2	2	0	1	1	0	1	0	0	0	0	0	0	0	2
1	1	151	1	2	2	0	1	0	0	0	0	0	0	0	0	0	0	2
1	1	151	1	2	2	1	0	0	0	0	0	0	0	0	0	0	0	2
1	1	119	2	2	2	1	0	0	0	0	0	0	0	0	0	0	0	2
1	1	151	2	2	2	0	1	0	0	0	0	0	0	0	1	0	0	1
1	1	151	2	2	2	0	0	0	1	0	0	0	0	0	0	0	0	2
1	1	151	2	2	2	0	0	0	1	0	0	0	0	0	0	0	0	2
1	1	151	2	2	2	1	0	0	0	0	0	0	0	0	0	0	0	1
1	1	151	2	2	2	1	0	0	0	0	0	0	0	0	0	0	0	2
1	1	151	2	2	2	1	0	0	0	0	0	0	0	0	0	0	0	2
1	1	151	2	2	2	0	1	1	0	0	0	0	0	0	0	0	0	2
1	1	164	2	2	2	1	0	0	0	0	0	0	0	0	0	0	0	2
1	1	151	2	2	2	1	0	0	0	0	0	0	0	0	0	0	0	2
1	1	177	2	2	2	1	0	0	0	0	0	0	0	0	0	0	0	2
1	1	151	2	2	2	1	0	0	0	0	0	0	0	0	0	0	0	1
1	1	151	2	2	2	1	0	0	0	0	0	0	0	0	0	0	0	1
1	1	151	2	2	2	1	0	0	0	0	0	0	0	0	0	0	0	1
1	1	53	2	2	2	0	0	0	1	0	0	0	0	0	0	0	0	2
1	1	191	2	2	2	0	0	1	0	0	0	0	0	0	0	0	0	2
1	1	151	2	2	2	0	1	0	0	0	0	0	0	0	0	0	0	2
1	1	151	2	2	2	0	0	1	0	0	0	0	0	0	0	1	0	2
1	1	151	2	2	2	1	0	0	0	0	0	0	0	0	0	0	0	1
1	1	151	2	2	2	1	0	0	0	0	0	0	0	0	0	0	0	1
1	1	151	2	2	2	1	0	0	0	0	0	0	0	0	0	0	0	2
1	1	151	2	2	2	1	0	0	0	0	0	0	0	0	0	0	0	2
1	1	191	1	2	2	1	0	0	0	0	0	0	0	0	0	0	0	2
1	1	183	2	2	2	1	0	0	0	0	0	0	0	0	0	0	0	2
1	1	81	2	2	2	0	0	0	1	0	0	0	0	0	0	0	0	2
1	1	177	2	2	2	1	0	0	0	0	0	0	0	0	0	0	0	2
1	1	81	1	2	2	1	0	0	0	0	0	0	0	0	0	0	0	2
1	1	81	2	2	2	1	0	0	0	0	0	0	0	0	0	0	0	2
1	1	81	2	2	2	1	0	0	0	0	0	0	0	0	0	0	0	2
1	1	183	2	2	2	1	0	0	0	0	0	0	0	0	0	0	0	2
1	1	151	2	2	2	1	0	0	0	0	0	0	0	0	0	0	0	2
1	1	151	1	2	2	0	0	1	0	0	0	0	0	0	0	0	0	2
1	1	151	2	2	2	1	0	0	0	0	0	0	0	0	0	0	0	2
1	1	151	2	2	2	1	0	0	0	0	0	0	0	0	0	0	0	2
1	1	151	2	2	2	1	0	0	0	0	0	0	0	0	0	0	0	2
1	1	151	2	2	2	1	0	0	0	0	0	0	0	0	0	0	0	2
1	1	151	2	2	2	1	0	0	0	0	0	0	0	0	0	0	0	2
1	1	151	1	2	2	0	0	1	0	0	0	0	0	0	0	0	0	2
1	1	151	2	2	2	0	0	1	0	0	0	0	0	0	0	0	0	2
1	1	191	2	2	2	1	0	0	0	0	0	0	0	0	0	0	0	2
1	1	191	2	2	2	0	1	1	0	0	0	0	0	0	0	0	0	2
1	1	191	1	2	2	0	1	0	0	0	0	0	0	0	0	0	0	2
1	1	129	2	2	2	1	0	0	0	0	0	0	0	0	0	0	0	2
1	1	62	2	2	2	0	0	0	1	0	0	0	0	0	0	0	0	2
1	1	62	2	2	2	1	0	0	0	0	0	0	0	0	0	0	0	2
1	1	129	2	2	2	1	0	0	0	0	0	0	0	0	0	0	0	2
1	1	164	2	2	2	0	0	1	0	0	0	0	0	0	0	0	0	2
1	1	62	2	2	2	1	0	0	0	0	0	0	0	0	0	0	0	1
1	1	93	2	2	2	1	0	0	0	0	0	0	0	0	0	0	0	2
1	1	177	2	2	2	1	0	0	0	0	0	0	0	0	0	0	0	2
1	1	177	2	2	2	1	0	0	0	0	0	0	0	0	0	0	0	1
1	1	177	2	2	2	1	0	0	0	0	0	0	0	0	0	0	0	2
1	1	177	2	2	2	0	1	0	0	0	0	0	0	0	1	1	0	1
1	1	177	2	2	2	1	0	0	0	0	0	0	0	0	0	0	0	2
1	1	191	2	2	2	0	0	1	0	0	0	0	0	0	0	0	1	1
1	1	100	2	2	2	1	0	0	0	0	0	0	0	0	0	0	0	2
1	1	100	2	2	2	0	1	0	1	0	0	0	0	0	1	0	0	2
1	1	81	2	2	2	0	0	0	0	0	0	0	0	0	1	0	0	2
1	1	177	2	2	2	0	1	1	0	0	0	0	0	0	0	0	0	1
1	1	177	2	2	2	1	0	0	0	0	0	0	0	0	0	0	0	2
1	1	151	2	2	2	0	0	1	0	0	0	0	1	0	0	0	0	2
1	1	106	1	2	2	0	0	0	0	0	0	0	0	0	0	0	1	2
1	1	161	2	2	2	1	0	0	0	0	0	0	0	0	0	0	0	1
1	1	161	2	2	2	0	0	0	0	0	0	0	0	0	1	0	0	1
1	1	151	2	2	2	1	0	0	0	0	0	0	0	0	0	0	0	2
1	1	100	2	2	2	1	0	0	0	0	0	0	0	0	0	0	0	1
1	1	100	2	2	2	0	0	0	0	0	0	0	0	0	0	1	0	2
1	1	151	2	2	2	1	0	0	0	0	0	0	0	0	0	0	0	2
1	1	100	2	2	2	0	0	1	0	0	0	0	0	0	0	0	0	2
1	1	100	2	2	2	1	0	0	0	0	0	0	0	0	0	0	0	2
1	1	87	1	2	2	1	0	0	0	0	0	0	0	0	0	0	0	2
1	1	87	1	2	2	0	1	0	0	0	0	0	0	0	0	0	0	2
1	1	87	2	2	2	1	0	0	0	0	0	0	0	0	0	0	0	1
1	1	87	1	2	2	0	0	1	0	0	0	0	0	0	0	0	0	2
1	1	87	1	2	2	1	0	0	0	0	0	0	0	0	0	0	0	2
1	1	183	2	2	2	1	0	0	0	0	0	0	0	0	0	0	0	2
1	1	100	2	2	2	0	0	1	0	0	0	0	0	0	0	0	0	1
1	1	177	2	2	2	1	0	0	0	0	0	0	0	0	0	0	0	2
1	1	177	2	2	2	1	0	0	0	0	0	0	0	0	0	0	0	1
1	1	177	2	2	2	1	0	0	0	0	0	0	0	0	0	0	0	2
1	1	177	2	2	2	0	1	1	1	0	0	0	0	0	0	0	0	2
1	1	177	2	2	2	0	0	0	0	0	0	0	1	0	0	0	0	2
1	1	177	2	2	2	1	0	0	0	0	0	0	0	0	0	0	0	2
1	1	177	2	2	2	1	0	0	0	0	0	0	0	0	0	0	0	2
1	1	177	2	2	2	1	0	0	0	0	0	0	0	0	0	0	0	1
1	1	177	2	2	2	1	0	0	0	0	0	0	0	0	0	0	0	1
1	1	177	2	2	2	0	1	0	0	0	0	0	0	0	1	0	0	2
1	1	177	2	2	2	0	1	0	0	0	0	0	0	0	0	0	0	2
1	1	45	2	2	2	0	0	0	1	0	0	0	0	0	0	0	0	2
1	1	151	2	2	2	1	0	0	0	0	0	0	0	0	0	0	0	2
1	1	177	2	2	2	0	1	0	0	0	0	0	0	1	1	1	0	1
1	1	177	1	2	2	0	0	0	0	1	0	0	0	0	0	1	0	1
1	1	87	2	2	2	0	0	0	0	0	0	0	0	0	1	0	0	1
1	1	151	2	2	2	1	0	0	0	0	0	0	0	0	0	0	0	2
1	1	45	2	2	2	1	0	0	0	0	0	0	0	0	0	0	0	1
1	1	177	2	2	2	0	0	0	0	0	0	0	0	0	0	1	0	2
1	1	53	2	2	2	0	0	1	0	0	0	0	0	0	0	0	0	2
1	1	53	2	2	2	1	0	0	0	0	0	0	0	0	0	0	0	2
1	1	177	2	2	2	0	0	1	0	0	0	0	0	0	0	0	0	2
1	1	129	2	2	2	1	0	0	0	0	0	0	0	0	0	0	0	2
1	1	177	2	2	2	1	0	0	0	0	0	0	0	0	0	0	0	2
1	1	177	2	2	2	1	0	0	0	0	0	0	0	0	0	0	0	2
1	1	177	2	2	2	0	1	1	0	0	0	0	0	0	0	0	0	1
1	1	177	2	2	2	1	0	0	0	0	0	0	0	0	0	0	0	1
1	1	177	2	2	2	0	1	0	0	0	0	0	0	0	0	0	0	2
1	1	177	2	2	2	0	1	0	0	0	0	0	0	0	0	0	0	1
1	1	177	2	2	2	1	0	0	0	0	0	0	0	0	0	0	0	2
1	1	177	2	2	2	0	0	1	1	0	0	1	0	0	0	0	0	2
1	1	177	2	2	2	1	0	0	0	0	0	0	0	0	0	0	0	2
1	1	177	2	2	2	1	0	0	0	0	0	0	0	0	0	0	0	2
1	1	177	2	2	2	0	1	1	1	0	0	0	0	0	0	0	0	2
1	1	177	2	2	2	1	0	0	0	0	0	0	0	0	0	0	0	2
1	1	177	2	2	2	1	0	0	0	0	0	0	0	0	0	0	0	2
1	1	177	2	2	2	0	0	0	0	0	0	1	1	1	0	0	0	1
1	1	177	2	2	2	1	0	0	0	0	0	0	0	0	0	0	0	2
1	1	177	1	2	2	0	1	0	0	0	0	0	0	0	0	0	0	1
1	1	177	2	2	2	1	0	0	0	0	0	0	0	0	0	0	0	1
1	1	177	2	2	2	1	0	0	0	0	0	0	0	0	0	0	0	2
1	1	177	2	2	2	1	0	0	0	0	0	0	0	0	0	0	0	2
1	1	177	2	2	2	1	0	0	0	0	0	0	0	0	0	0	0	1
1	1	177	2	2	2	1	0	0	0	0	0	0	0	0	0	0	0	2
1	1	177	2	2	2	1	0	0	0	0	0	0	0	0	0	0	0	2
1	1	177	1	2	2	0	1	1	1	0	0	0	0	0	1	1	0	1
1	1	177	1	2	2	0	0	0	1	0	0	0	0	0	1	0	0	1
1	1	177	2	2	2	1	0	0	0	0	0	0	0	0	0	0	0	2
1	1	177	1	2	2	0	0	0	0	0	0	0	0	0	0	1	0	2
1	1	177	2	2	2	0	1	1	0	0	0	1	0	0	0	1	0	1
1	1	151	2	2	2	1	0	0	0	0	0	0	0	0	0	0	0	2
1	1	177	2	2	2	0	1	0	0	0	0	0	0	0	0	0	0	2
1	1	177	2	2	2	0	1	0	0	0	0	0	0	0	0	1	0	1
1	1	177	2	2	2	1	0	0	0	0	0	0	0	0	0	0	0	1
1	1	177	2	2	2	1	0	0	0	0	0	0	0	0	0	0	0	2
1	1	177	2	2	2	1	0	0	0	0	0	0	0	0	0	0	0	2
1	1	177	2	2	2	0	0	0	0	0	0	0	0	0	1	0	0	2
1	1	177	2	2	2	1	0	0	0	0	0	0	0	0	0	0	0	2
1	1	177	2	2	2	1	0	0	0	0	0	0	0	0	0	0	0	2
1	1	177	2	2	2	0	0	1	0	0	0	0	0	0	0	0	0	2
1	1	177	2	2	2	1	0	0	0	0	0	0	0	0	0	0	0	2
1	1	177	2	2	2	1	0	0	0	0	0	0	0	0	0	0	0	2
1	1	97	2	2	2	0	1	0	0	0	0	0	0	0	0	0	0	2
1	1	177	2	2	2	1	0	0	0	0	0	0	0	0	0	0	0	2
1	1	184	2	2	2	1	0	0	0	0	0	0	0	0	0	0	0	2
1	1	177	2	2	2	0	1	1	0	0	0	0	0	0	0	0	0	2
1	1	177	2	2	2	1	0	0	0	0	0	0	0	0	0	0	0	2
1	1	177	2	2	2	1	0	0	0	0	0	0	0	0	0	0	0	2
1	1	191	2	2	2	1	0	0	0	0	0	0	0	0	0	0	0	2
1	1	191	1	2	2	0	1	0	0	0	0	1	0	0	0	0	0	2
1	1	191	2	2	2	0	0	1	0	1	0	0	0	0	0	0	0	2
1	1	177	2	2	2	1	0	0	0	0	0	0	0	0	0	0	0	2
1	1	177	2	2	2	1	0	0	0	0	0	0	0	0	0	0	0	2
1	1	177	2	2	2	0	0	1	0	0	0	0	0	0	0	0	0	2
1	1	53	2	2	2	0	0	0	1	0	0	0	0	0	0	0	0	2
1	1	177	2	2	2	0	1	0	0	0	0	0	0	0	0	0	0	2
1	1	191	2	2	2	0	1	1	1	0	0	0	0	0	0	0	0	2
1	1	191	1	2	2	0	1	0	0	0	0	0	1	0	0	0	0	2
1	1	177	2	2	2	0	1	1	0	0	0	0	0	0	0	0	0	1
1	1	177	2	2	2	1	0	0	0	0	0	0	0	0	0	0	0	1
1	1	177	1	2	2	1	0	0	0	0	0	0	0	0	0	0	0	2
1	1	177	2	2	2	0	0	0	0	0	0	0	0	0	0	1	0	1
1	1	177	2	2	2	0	0	1	0	0	0	0	0	0	0	0	0	1
1	1	177	2	2	2	1	0	0	0	0	0	0	0	0	0	0	0	2
1	1	106	2	2	2	1	0	0	0	0	0	0	0	0	0	0	0	2
1	1	177	2	2	2	1	0	0	0	0	0	0	0	0	0	0	0	2
1	1	177	2	2	2	1	0	0	0	0	0	0	0	0	0	0	0	2
1	1	177	2	2	2	1	0	0	0	0	0	0	0	0	0	0	0	2
1	1	36	1	2	2	0	1	1	0	0	0	0	0	0	1	1	0	1
1	1	177	2	2	2	0	1	0	0	1	0	0	0	0	0	0	0	2
1	1	177	1	2	2	0	1	0	0	0	0	0	0	0	0	1	0	1
1	1	177	2	2	2	1	0	0	0	0	0	0	0	0	0	0	0	2
1	1	177	2	2	2	0	0	0	0	0	0	0	0	0	0	1	0	2
1	1	177	2	2	2	0	0	1	0	0	0	0	0	0	0	0	0	2
1	1	177	2	2	2	1	0	0	0	0	0	0	0	0	0	0	0	2
1	1	177	2	2	2	1	0	0	0	0	0	0	0	0	0	0	0	1
1	1	177	2	2	2	1	0	0	0	0	0	0	0	0	0	0	0	2
1	1	151	2	2	2	1	0	0	0	0	0	0	0	0	0	0	0	2
1	1	177	2	2	2	0	0	0	0	0	0	1	0	0	0	1	0	2
1	1	106	2	2	2	1	0	0	0	0	0	0	0	0	0	0	0	2
1	1	177	1	2	2	0	0	1	0	0	0	0	0	0	0	0	0	1
1	1	177	2	2	2	0	1	0	0	0	0	0	0	0	0	0	0	1
1	1	151	2	2	2	0	1	0	0	0	0	0	0	0	0	0	0	1
1	1	81	2	2	2	0	0	0	0	0	0	1	0	0	1	0	0	2
1	1	177	2	2	2	0	1	0	0	0	0	0	0	0	0	0	0	1
1	1	177	2	2	2	1	0	0	0	0	0	0	0	0	0	0	0	1
1	1	151	2	2	2	1	0	0	0	0	0	0	0	0	0	0	0	2
1	1	177	2	2	2	1	0	0	0	0	0	0	0	0	0	0	0	2
1	1	177	1	2	2	1	0	0	0	0	0	0	0	0	0	0	0	2
1	1	131	2	2	2	0	0	1	0	0	0	0	0	0	1	0	0	2
1	1	53	2	2	2	0	0	1	0	0	0	1	0	0	1	0	0	1
1	1	177	2	2	2	0	0	1	0	0	0	0	0	0	0	0	0	1
1	1	169	1	2	2	0	1	1	1	0	0	1	1	0	0	0	0	2
1	1	151	1	2	2	0	0	0	1	0	0	0	0	0	1	0	0	1
1	1	81	2	2	2	0	1	0	0	0	0	0	0	0	0	0	0	1
1	1	151	2	2	2	1	0	0	0	0	0	0	0	0	0	0	0	2
1	1	151	2	2	2	1	0	0	0	0	0	0	0	0	0	0	0	1
1	1	151	2	2	2	1	0	0	0	0	0	0	0	0	0	0	0	2
1	1	151	2	2	2	1	0	0	0	0	0	0	0	0	0	0	0	2
1	1	53	1	2	2	0	1	1	0	0	0	0	0	0	0	0	0	1
1	1	53	1	2	2	0	0	1	0	0	0	0	0	0	0	0	0	2
1	1	53	2	2	2	0	1	1	1	0	0	0	0	0	0	0	0	1
1	1	53	1	2	2	1	0	0	0	0	0	0	0	0	0	0	0	2
1	1	131	2	2	2	0	1	1	0	0	0	0	0	0	0	0	0	2
1	1	106	2	2	2	1	0	0	0	0	0	0	0	0	0	0	0	2
1	1	164	2	2	2	0	1	0	0	0	0	0	0	0	0	0	0	2
1	1	164	2	2	2	0	1	1	1	0	0	0	0	0	0	0	0	2
1	1	53	2	2	2	0	1	0	0	0	0	0	0	0	0	0	0	1
1	1	164	2	2	2	1	0	0	0	0	0	0	0	0	0	0	0	2
1	1	164	2	2	2	1	0	0	0	0	0	0	0	0	0	0	0	2
1	1	164	2	2	2	0	1	0	0	0	0	0	0	0	0	0	0	2
1	1	164	1	2	2	0	0	1	0	0	0	1	0	0	0	0	0	2
1	1	164	2	2	2	1	0	0	0	0	0	0	0	0	0	0	0	2
1	1	164	2	2	2	1	0	0	0	0	0	0	0	0	0	0	0	2
1	1	164	2	2	2	1	0	0	0	0	0	0	0	0	0	0	0	2
1	1	164	2	2	2	1	0	0	0	0	0	0	0	0	0	0	0	2
1	1	164	2	2	2	1	0	0	0	0	0	0	0	0	0	0	0	2
1	1	53	2	2	2	1	0	0	0	0	0	0	0	0	0	0	0	1
1	1	53	2	2	2	1	0	0	0	0	0	0	0	0	0	0	0	2
1	1	106	2	2	2	1	0	0	0	0	0	0	0	0	0	0	0	2
1	1	131	2	2	2	0	0	0	0	0	0	0	0	0	1	0	0	1
1	1	106	2	2	2	1	0	0	0	0	0	0	0	0	0	0	0	2
1	1	164	2	2	2	1	0	0	0	0	0	0	0	0	0	0	0	1
1	1	164	2	2	2	1	0	0	0	0	0	0	0	0	0	0	0	2
1	1	164	2	2	2	1	0	0	0	0	0	0	0	0	0	0	0	2
1	1	53	2	2	2	0	0	1	0	0	0	0	0	0	0	0	0	2
1	1	53	2	2	2	0	1	0	0	0	0	0	0	0	0	0	0	2
1	1	53	2	2	2	1	0	0	0	0	0	0	0	0	0	0	0	1
1	1	53	2	2	2	0	1	0	0	0	0	0	0	0	0	0	0	1
1	1	53	2	2	2	1	0	0	0	0	0	0	0	0	0	0	0	1
1	1	53	2	2	2	1	0	0	0	0	0	0	0	0	0	0	0	2
1	1	106	2	2	2	1	0	0	0	0	0	0	0	0	0	0	0	2
1	1	53	2	2	2	1	0	0	0	0	0	0	0	0	0	0	0	2
1	1	182	2	2	2	1	0	0	0	0	0	0	0	0	0	0	0	2
1	1	53	2	2	2	1	0	0	0	0	0	0	0	0	0	0	0	2
1	1	53	2	2	2	1	0	0	0	0	0	0	0	0	0	0	0	1
1	1	62	2	2	2	1	0	0	0	0	0	0	0	0	0	0	0	2
1	1	62	2	2	2	1	0	0	0	0	0	0	0	0	0	0	0	2
1	1	62	2	2	2	1	0	0	0	0	0	0	0	0	0	0	0	2
1	1	62	2	2	2	0	1	0	0	0	0	0	0	0	0	0	0	1
1	1	62	2	2	2	0	0	1	0	0	0	0	0	0	0	0	0	2
1	1	62	2	2	2	1	0	0	0	0	0	0	0	0	0	0	0	1
1	1	62	2	2	2	0	0	0	0	0	0	0	1	0	0	0	0	2
1	1	182	1	2	2	1	0	0	0	0	0	0	0	0	0	0	0	1
1	1	100	2	2	2	1	0	0	0	0	0	0	0	0	0	0	0	2
1	1	131	2	2	2	0	0	0	0	1	0	0	0	0	0	1	0	2
1	1	164	2	2	2	0	1	0	0	0	0	0	0	0	0	0	0	2
1	1	131	2	2	2	0	1	1	0	0	0	0	0	0	0	0	0	2
1	1	125	2	2	2	0	0	1	0	0	0	0	0	0	0	0	0	2
1	1	164	2	2	2	1	0	0	0	0	0	0	0	0	0	0	0	1
1	1	131	2	2	2	1	0	0	0	0	0	0	0	0	0	0	0	2
1	1	125	2	2	2	1	0	0	0	0	0	0	0	0	0	0	0	2
1	1	131	2	2	2	1	0	0	0	0	0	0	0	0	0	0	0	2
1	1	66	2	2	2	0	0	1	0	0	0	0	0	0	0	0	1	2
1	1	151	2	2	2	1	0	0	0	0	0	0	0	0	0	0	0	1
1	1	164	2	2	2	1	0	0	0	0	0	0	0	0	0	0	0	2
1	1	164	2	2	2	0	0	1	1	0	0	0	0	0	0	0	0	2
1	1	164	2	2	2	1	0	0	0	0	0	0	0	0	0	0	0	2
1	1	164	1	2	2	1	0	0	0	0	0	0	0	0	0	0	0	2
1	1	164	1	2	2	1	0	0	0	0	0	0	0	0	0	0	0	2
1	1	164	2	2	2	1	0	0	0	0	0	0	0	0	0	0	0	2
1	1	164	1	2	2	1	0	0	0	0	0	0	0	0	0	0	0	2
1	1	164	2	2	2	0	1	1	1	0	0	1	0	0	1	0	0	1
1	1	164	2	2	2	0	0	1	0	0	0	0	0	0	0	0	0	2
1	1	164	2	2	2	1	0	0	0	0	0	0	0	0	0	0	0	2
1	1	78	2	2	2	0	0	1	0	0	0	0	0	0	1	0	0	2
1	1	78	2	2	2	1	0	0	0	0	0	0	0	0	0	0	0	2
1	1	164	2	2	2	1	0	0	0	0	0	0	0	0	0	0	0	2
1	1	78	2	2	2	1	0	0	0	0	0	0	0	0	0	0	0	2
1	1	177	2	2	2	1	0	0	0	0	0	0	0	0	0	0	0	2
1	1	177	2	2	2	1	0	0	0	0	0	0	0	0	0	0	0	1
1	1	177	2	2	2	0	1	1	0	0	0	0	0	0	0	1	0	1
1	1	183	2	2	2	0	0	0	0	0	0	0	0	0	1	0	0	1
1	1	78	2	2	2	1	0	0	0	0	0	0	0	0	0	0	0	2
1	1	78	2	2	2	1	0	0	0	0	0	0	0	0	0	0	0	2
1	1	78	2	2	2	1	0	0	0	0	0	0	0	0	0	0	0	2
1	1	78	2	2	2	0	0	1	0	0	0	0	0	0	0	0	0	2
1	1	78	2	2	2	1	0	0	0	0	0	0	0	0	0	0	0	2
1	1	78	2	2	2	1	0	0	0	0	0	0	0	0	0	0	0	2
1	1	78	2	2	2	0	1	1	0	0	0	0	0	0	0	0	0	2
1	1	78	1	2	2	0	0	1	0	0	0	0	0	0	0	0	0	2
1	1	78	2	2	2	0	1	0	0	0	0	0	0	0	0	0	0	2
1	1	78	2	2	2	1	0	0	0	0	0	0	0	0	0	0	0	2
1	1	78	2	2	2	1	0	0	0	0	0	0	0	0	0	0	0	1
1	1	78	2	2	2	1	0	0	0	0	0	0	0	0	0	0	0	2
1	1	177	2	2	2	1	0	0	0	0	0	0	0	0	0	0	0	2
1	1	78	2	2	2	1	0	0	0	0	0	0	0	0	0	0	0	2
1	1	78	2	2	2	0	1	0	0	0	0	0	0	0	0	0	0	1
1	1	78	2	2	2	0	1	0	0	0	0	0	0	0	0	0	0	2
1	1	183	2	2	2	1	0	0	0	0	0	0	0	0	0	0	0	2
1	1	78	2	2	2	0	0	1	0	0	0	0	0	0	0	0	0	2
1	1	78	2	2	2	0	0	0	1	0	0	0	0	0	0	0	0	2
1	1	78	1	2	2	1	0	0	0	0	0	0	0	0	0	0	0	2
1	1	78	2	2	2	1	0	0	0	0	0	0	0	0	0	0	0	1
1	1	78	2	2	2	0	0	0	1	0	0	0	0	0	0	0	0	2
1	1	78	2	2	2	1	0	0	0	0	0	0	0	0	0	0	0	2
1	1	78	2	2	2	0	0	1	0	0	0	0	0	0	0	0	0	2
1	1	78	2	2	2	0	0	1	0	0	0	0	0	0	0	0	0	2
1	1	78	1	2	2	0	1	1	1	1	0	0	0	0	0	0	1	2
1	1	78	2	2	2	0	0	0	0	0	0	0	1	0	0	0	0	1
1	1	78	2	2	2	1	0	0	0	0	0	0	0	0	0	0	0	2
1	1	131	2	2	2	1	0	0	0	0	0	0	0	0	0	0	0	2
1	1	78	2	2	2	1	0	0	0	0	0	0	0	0	0	0	0	2
1	1	78	2	2	2	0	0	0	0	0	0	0	0	0	1	0	0	2
1	1	183	2	2	2	1	0	0	0	0	0	0	0	0	0	0	0	2
1	1	106	2	2	2	0	1	1	0	0	0	0	0	0	0	0	0	1
1	1	78	2	2	2	0	0	1	0	0	0	0	0	0	0	0	0	2
1	1	183	2	2	2	1	0	0	0	0	0	0	0	0	0	0	0	2
1	1	183	2	2	2	1	0	0	0	0	0	0	0	0	0	0	0	2
1	1	78	2	2	2	1	0	0	0	0	0	0	0	0	0	0	0	2
1	1	78	2	2	2	1	0	0	0	0	0	0	0	0	0	0	0	2
1	1	78	2	2	2	0	0	1	0	0	0	0	0	0	0	0	0	2
1	1	78	2	2	2	1	0	0	0	0	0	0	0	0	0	0	0	2
1	1	78	2	2	2	0	0	1	0	0	0	0	0	0	0	0	0	1
1	1	78	2	2	2	1	0	0	0	0	0	0	0	0	0	0	0	2
1	1	78	2	2	2	0	0	1	0	0	0	0	0	0	0	0	0	1
1	1	184	1	2	2	0	1	1	1	0	0	0	0	0	0	0	0	2
1	1	151	1	2	2	1	0	0	0	0	0	0	0	0	0	0	0	2
1	1	106	2	2	2	1	0	0	0	0	0	0	0	0	0	0	0	2
1	1	151	1	2	2	0	1	1	1	1	1	0	0	0	0	0	0	2
1	1	151	2	2	2	0	0	0	0	0	1	0	0	0	0	0	0	1
1	1	78	2	2	2	1	0	0	0	0	0	0	0	0	0	0	0	2
1	1	78	2	2	2	1	0	0	0	0	0	0	0	0	0	0	0	2
1	1	78	2	2	2	1	0	0	0	0	0	0	0	0	0	0	0	2
1	1	182	2	2	2	1	0	0	0	0	0	0	0	0	0	0	0	2
1	1	78	2	2	2	0	1	1	0	0	0	0	0	0	0	0	0	2
1	1	78	2	2	2	1	0	0	0	0	0	0	0	0	0	0	0	2
1	1	78	2	2	2	1	0	0	0	0	0	0	0	0	0	0	0	2
1	1	62	2	2	2	0	0	0	0	0	0	1	0	0	0	0	0	2
1	1	78	2	2	2	0	0	0	1	0	0	0	0	0	0	0	0	1
1	1	177	2	2	2	1	0	0	0	0	0	0	0	0	0	0	0	1
1	1	106	2	2	2	1	0	0	0	0	0	0	0	0	0	0	0	2
1	1	53	2	2	2	1	0	0	0	0	0	0	0	0	0	0	0	2
1	1	106	2	2	2	1	0	0	0	0	0	0	0	0	0	0	0	2
1	1	78	2	2	2	0	1	0	0	0	0	0	0	0	0	0	0	2
1	1	78	2	2	2	0	0	1	0	0	0	0	0	0	0	0	0	2
1	1	78	1	2	2	1	0	0	0	0	0	0	0	0	0	0	0	2
1	1	78	1	2	2	1	0	0	0	0	0	0	0	0	0	0	0	2
1	1	78	2	2	2	1	0	0	0	0	0	0	0	0	0	0	0	2
1	1	78	2	2	2	1	0	0	0	0	0	0	0	0	0	0	0	2
1	1	78	2	2	2	1	0	0	0	0	0	0	0	0	0	0	0	2
1	1	78	1	2	2	0	1	0	0	0	0	0	0	0	0	0	0	2
1	1	78	2	2	2	1	0	0	0	0	0	0	0	0	0	0	0	2
1	1	78	2	2	2	1	0	0	0	0	0	0	0	0	0	0	0	2
1	1	78	1	2	2	1	0	0	0	0	0	0	0	0	0	0	0	1
1	1	183	2	2	2	1	0	0	0	0	0	0	0	0	0	0	0	2
1	1	106	2	2	2	0	1	0	0	0	0	0	0	0	0	0	0	2
1	1	78	2	2	2	1	0	0	0	0	0	0	0	0	0	0	0	2
1	1	78	2	2	2	1	0	0	0	0	0	0	0	0	0	0	0	2
1	1	78	2	2	2	1	0	0	0	0	0	0	0	0	0	0	0	2
1	1	78	2	2	2	1	0	0	0	0	0	0	0	0	0	0	0	2
1	1	53	2	2	2	0	0	1	0	0	0	0	0	1	0	0	0	1
1	1	53	2	2	2	1	0	0	0	0	0	0	0	0	0	0	0	1
1	1	78	2	2	2	1	0	0	0	0	0	0	0	0	0	0	0	2
1	1	53	2	2	2	0	0	1	0	0	0	0	0	0	0	0	0	2
1	1	53	2	2	2	1	0	0	0	0	0	0	0	0	0	0	0	2
1	1	53	2	2	2	1	0	0	0	0	0	0	0	0	0	0	0	2
1	1	78	2	2	2	1	0	0	0	0	0	0	0	0	0	0	0	2
1	1	78	2	2	2	1	0	0	0	0	0	0	0	0	0	0	0	2
1	1	78	2	2	2	1	0	0	0	0	0	0	0	0	0	0	0	1
1	1	78	2	2	2	0	1	0	0	0	0	0	0	0	0	0	0	2
1	1	183	2	2	2	1	0	0	0	0	0	0	0	0	0	0	0	2
1	1	78	2	2	2	1	0	0	0	0	0	0	0	0	0	0	0	1
1	1	164	2	2	2	0	0	1	0	0	0	0	0	0	0	0	0	2
1	1	53	2	2	2	1	0	0	0	0	0	0	0	0	0	0	0	1
1	1	53	2	2	2	1	0	0	0	0	0	0	0	0	0	0	0	2
1	1	53	2	2	2	0	0	1	0	0	0	0	0	0	0	0	0	2
1	1	53	2	2	2	0	1	1	0	0	0	0	0	0	0	0	0	1
1	1	53	2	2	2	1	0	0	0	0	0	0	0	0	0	0	0	2
1	1	53	2	2	2	0	1	1	1	0	0	0	0	0	0	0	0	2
1	1	164	1	2	2	0	0	1	0	0	0	0	0	0	0	0	0	2
1	1	53	2	2	2	1	0	0	0	0	0	0	0	0	0	0	0	1
1	1	164	2	2	2	1	0	0	0	0	0	0	0	0	0	0	0	2
1	1	164	2	2	2	0	0	0	1	0	0	0	0	0	0	0	0	2
1	1	164	2	2	2	1	0	0	0	0	0	0	0	0	0	0	0	2
1	1	164	2	2	2	1	0	0	0	0	0	0	0	0	0	0	0	2
1	1	182	2	2	2	1	0	0	0	0	0	0	0	0	0	0	0	1
1	1	164	2	2	2	1	0	0	0	0	0	0	0	0	0	0	0	2
1	1	53	2	2	2	1	0	0	0	0	0	0	0	0	0	0	0	2
1	1	164	2	2	2	0	0	0	1	0	0	0	0	0	0	0	0	2
1	1	106	2	2	2	1	0	0	0	0	0	0	0	0	0	0	0	2
1	1	164	2	2	2	1	0	0	0	0	0	0	0	0	0	0	0	2
1	1	164	2	2	2	0	1	1	0	0	0	0	0	0	0	0	0	2
1	1	164	2	2	2	1	0	0	0	0	0	0	0	0	0	0	0	2
1	1	151	2	2	2	1	0	0	0	0	0	0	0	0	0	0	0	1
1	1	151	2	2	2	1	0	0	0	0	0	0	0	0	0	0	0	2
1	1	151	2	2	2	1	0	0	0	0	0	0	0	0	0	0	0	2
1	1	164	2	2	2	1	0	0	0	0	0	0	0	0	0	0	0	2
1	1	138	2	2	2	0	0	0	1	0	0	0	0	0	0	0	0	2
1	1	129	2	2	2	1	0	0	0	0	0	0	0	0	0	0	0	2
1	1	129	2	2	2	1	0	0	0	0	0	0	0	0	0	0	0	2
1	1	129	2	2	2	1	0	0	0	0	0	0	0	0	0	0	0	2
1	1	129	2	2	2	1	0	0	0	0	0	0	0	0	0	0	0	2
1	1	129	2	2	2	0	1	0	0	1	0	0	0	1	0	0	1	2
1	1	177	2	2	2	1	0	0	0	0	0	0	0	0	0	0	0	2
1	1	129	2	2	2	0	0	1	0	0	0	0	0	0	0	0	0	2
1	1	129	2	2	2	1	0	0	0	0	0	0	0	0	0	0	0	2
1	1	78	2	2	2	1	0	0	0	0	0	0	0	0	0	0	0	2
1	1	129	2	2	2	0	1	0	0	0	0	0	0	0	0	0	0	2
1	1	78	2	2	2	1	0	0	0	0	0	0	0	0	0	0	0	2
1	1	78	2	2	2	1	0	0	0	0	0	0	0	0	0	0	0	2
1	1	78	2	2	2	1	0	0	0	0	0	0	0	0	0	0	0	2
1	1	78	2	2	2	0	0	1	0	0	0	0	0	0	0	0	0	2
1	1	78	2	2	2	1	0	0	0	0	0	0	0	0	0	0	0	2
1	1	78	2	2	2	1	0	0	0	0	0	0	0	0	0	0	0	2
1	1	78	2	2	2	0	0	1	0	0	0	0	0	0	0	0	0	2
1	1	36	2	2	2	0	0	1	0	0	0	0	0	0	0	0	0	2
1	1	129	1	2	2	1	0	0	0	0	0	0	0	0	0	0	0	2
1	1	78	2	2	2	1	0	0	0	0	0	0	0	0	0	0	0	2
1	1	78	2	2	2	1	0	0	0	0	0	0	0	0	0	0	0	2
1	1	78	2	2	2	1	0	0	0	0	0	0	0	0	0	0	0	2
1	1	78	2	2	2	1	0	0	0	0	0	0	0	0	0	0	0	2
1	1	78	2	2	2	1	0	0	0	0	0	0	0	0	0	0	0	1
1	1	78	2	2	2	0	0	0	0	0	0	0	0	0	1	1	0	1
1	1	78	2	2	2	1	0	0	0	0	0	0	0	0	0	0	0	2
1	1	78	2	2	2	1	0	0	0	0	0	0	0	0	0	0	0	2
1	1	78	2	2	2	1	0	0	0	0	0	0	0	0	0	0	0	2
1	1	78	2	2	2	1	0	0	0	0	0	0	0	0	0	0	0	2
1	1	78	2	2	2	1	0	0	0	0	0	0	0	0	0	0	0	2
1	1	78	2	2	2	1	0	0	0	0	0	0	0	0	0	0	0	2
1	1	78	2	2	2	1	0	0	0	0	0	0	0	0	0	0	0	2
1	1	129	2	2	2	1	0	0	0	0	0	0	0	0	0	0	0	2
1	1	164	1	2	2	1	0	0	0	0	0	0	0	0	0	0	0	2
1	1	78	2	2	2	1	0	0	0	0	0	0	0	0	0	0	0	2
1	1	78	2	2	2	1	0	0	0	0	0	0	0	0	0	0	0	2
1	1	78	2	2	2	1	0	0	0	0	0	0	0	0	0	0	0	2
1	1	78	2	2	2	0	0	1	1	0	0	0	0	0	0	0	0	2
1	1	78	2	2	2	1	0	0	0	0	0	0	0	0	0	0	0	2
1	1	78	2	2	2	1	0	0	0	0	0	0	0	0	0	0	0	2
1	1	78	2	2	2	1	0	0	0	0	0	0	0	0	0	0	0	2
1	1	78	1	2	2	1	0	0	0	0	0	0	0	0	0	0	0	2
1	1	78	2	2	2	1	0	0	0	0	0	0	0	0	0	0	0	2
1	1	78	2	2	2	0	0	1	0	0	0	1	0	0	0	0	0	2
1	1	78	2	2	2	1	0	0	0	0	0	0	0	0	0	0	0	1
1	1	78	2	2	2	1	0	0	0	0	0	0	0	0	0	0	0	1
1	1	129	2	2	2	1	0	0	0	0	0	0	0	0	0	0	0	2
1	1	78	2	2	2	1	0	0	0	0	0	0	0	0	0	0	0	2
1	1	78	2	2	2	1	0	0	0	0	0	0	0	0	0	0	0	2
1	1	78	2	2	2	1	0	0	0	0	0	0	0	0	0	0	0	2
1	1	78	2	2	2	0	0	0	0	0	0	0	0	0	1	0	0	2
1	1	78	2	2	2	1	0	0	0	0	0	0	0	0	0	0	0	2
1	1	78	2	2	2	1	0	0	0	0	0	0	0	0	0	0	0	2
1	1	78	2	2	2	0	1	0	0	0	0	0	0	0	0	0	0	2
1	1	78	2	2	2	1	0	0	0	0	0	0	0	0	0	0	0	2
1	1	78	2	2	2	1	0	0	0	0	0	0	0	0	0	0	0	2
1	1	182	2	2	2	1	0	0	0	0	0	0	0	0	0	0	0	2
1	1	182	2	2	2	0	0	0	1	0	0	0	0	0	0	0	0	1
1	1	164	2	2	2	0	0	1	0	1	0	0	0	0	0	0	0	2
1	1	81	2	2	2	1	0	0	0	0	0	0	0	0	0	0	0	2
1	1	182	1	2	2	0	0	1	0	0	0	0	0	0	0	0	0	2
1	1	182	2	2	2	0	0	0	1	0	0	0	0	0	1	0	0	1
1	1	164	2	2	2	1	0	0	0	0	0	0	0	0	0	0	0	2
1	1	164	2	2	2	0	0	0	0	0	0	0	0	0	0	1	0	2
1	1	78	2	2	2	0	1	1	0	0	0	0	0	0	1	0	0	1
1	1	78	2	2	2	1	0	0	0	0	0	0	0	0	0	0	0	2
1	1	78	2	2	2	1	0	0	0	0	0	0	0	0	0	0	0	2
1	1	164	2	2	2	1	0	0	0	0	0	0	0	0	0	0	0	2
1	1	151	2	2	2	1	0	0	0	0	0	0	0	0	0	0	0	2
1	1	164	2	2	2	1	0	0	0	0	0	0	0	0	0	0	0	2
1	1	78	2	2	2	0	0	1	0	0	0	0	0	0	0	0	0	1
1	1	131	2	2	2	1	0	0	0	0	0	0	0	0	0	0	0	2
1	1	78	2	2	2	1	0	0	0	0	0	0	0	0	0	0	0	2
1	1	164	2	2	2	1	0	0	0	0	0	0	0	0	0	0	0	2
1	1	164	2	2	2	0	0	0	0	1	0	0	0	0	0	0	0	2
1	1	53	2	2	2	0	0	1	0	0	0	0	0	0	0	0	0	2
1	1	87	2	2	2	1	0	0	0	0	0	0	0	0	0	0	0	2
1	1	169	2	2	2	0	0	1	0	0	0	0	0	0	0	0	0	2
1	1	182	1	2	2	1	0	0	0	0	0	0	0	0	0	0	0	2
1	1	182	2	2	2	1	0	0	0	0	0	0	0	0	0	0	0	2
1	1	182	2	2	2	1	0	0	0	0	0	0	0	0	0	0	0	2
1	1	182	2	2	2	1	0	0	0	0	0	0	0	0	0	0	0	2
1	1	164	2	2	2	0	0	1	0	0	0	0	0	0	0	0	0	1
1	1	81	2	2	2	1	0	0	0	0	0	0	0	0	0	0	0	2
1	1	182	2	2	2	0	1	1	0	0	0	0	0	0	0	0	0	2
1	1	182	2	2	2	1	0	0	0	0	0	0	0	0	0	0	0	2
1	1	182	2	2	2	1	0	0	0	0	0	0	0	0	0	0	0	2
1	1	182	2	2	2	1	0	0	0	0	0	0	0	0	0	0	0	2
1	1	182	2	2	2	1	0	0	0	0	0	0	0	0	0	0	0	2
1	1	182	2	2	2	1	0	0	0	0	0	0	0	0	0	0	0	1
1	1	129	2	2	2	1	0	0	0	0	0	0	0	0	0	0	0	2
1	1	182	1	2	2	1	0	0	0	0	0	0	0	0	0	0	0	2
1	1	151	2	2	2	0	1	0	1	0	0	0	0	0	0	0	0	1
1	1	182	2	2	2	1	0	0	0	0	0	0	0	0	0	0	0	1
1	1	182	2	2	2	0	0	1	0	0	0	0	0	0	0	0	0	2
1	1	53	2	2	2	0	0	0	1	0	0	1	0	0	1	0	0	2
1	1	53	2	2	2	0	0	1	0	0	0	0	0	0	0	0	0	2
1	1	53	2	2	2	0	0	0	1	0	0	1	0	0	1	0	0	2
1	1	53	1	2	2	0	0	1	1	0	0	0	0	0	0	0	0	2
1	1	53	2	2	2	0	1	0	1	0	0	0	0	0	1	0	0	1
1	1	53	2	2	2	1	0	0	0	0	0	0	0	0	0	0	0	2
1	1	62	1	2	2	0	0	1	0	0	0	0	0	0	0	0	0	2
1	1	60	2	2	2	0	0	1	1	0	0	0	0	0	1	0	0	2
1	1	78	2	2	2	0	0	1	0	0	0	0	0	0	0	0	0	1
1	1	53	2	2	2	0	0	0	0	0	0	0	0	0	1	0	0	1
1	1	53	1	2	2	0	0	1	1	0	0	0	0	0	0	0	0	1
1	1	53	2	2	2	0	0	0	1	0	0	1	0	0	0	0	0	1
1	1	78	1	2	2	1	0	0	0	0	0	0	0	0	0	0	0	2
1	1	53	2	2	2	0	1	0	0	0	0	0	0	0	0	0	0	2
1	1	78	2	2	2	1	0	0	0	0	0	0	0	0	0	0	0	2
1	1	106	2	2	2	1	0	0	0	0	0	0	0	0	0	0	0	2
1	1	78	2	2	2	1	0	0	0	0	0	0	0	0	0	0	0	2
1	1	53	2	2	2	0	1	1	1	0	0	0	0	1	0	0	0	1
1	1	78	2	2	2	1	0	0	0	0	0	0	0	0	0	0	0	2
1	1	78	2	2	2	1	0	0	0	0	0	0	0	0	0	0	0	2
1	1	78	2	2	2	1	0	0	0	0	0	0	0	0	0	0	0	2
1	1	78	2	2	2	0	0	0	0	0	0	0	0	0	1	0	0	2
1	1	182	2	2	2	1	0	0	0	0	0	0	0	0	0	0	0	2
1	1	191	1	2	2	0	1	1	0	0	0	0	0	0	0	0	0	2
1	1	78	2	2	2	1	0	0	0	0	0	0	0	0	0	0	0	2
1	1	191	1	2	2	0	1	0	0	0	0	0	0	0	0	0	0	2
1	1	164	2	2	2	0	0	1	1	0	0	0	0	0	0	0	0	2
1	1	164	2	2	2	0	0	0	0	0	0	0	0	0	1	0	0	2
1	1	164	2	2	2	0	0	1	0	0	0	0	0	0	0	0	0	2
1	1	164	2	2	2	0	1	0	0	0	0	0	0	0	0	0	0	2
1	1	164	2	2	2	0	1	0	0	0	0	0	0	0	0	0	0	2
1	1	164	2	2	2	0	1	0	0	0	0	0	0	0	0	0	0	2
1	1	129	2	2	2	1	0	0	0	0	0	0	0	0	0	0	0	2
1	1	182	2	2	2	0	1	1	0	0	0	0	0	0	0	0	0	2
1	1	182	2	2	2	1	0	0	0	0	0	0	0	0	0	0	0	1
1	1	182	2	2	2	1	0	0	0	0	0	0	0	0	0	0	0	2
1	1	182	2	2	2	1	0	0	0	0	0	0	0	0	0	0	0	2
1	1	182	1	2	2	0	1	0	0	0	0	0	0	0	0	0	0	2
1	1	182	2	2	2	1	0	0	0	0	0	0	0	0	0	0	0	2
1	1	182	2	2	2	1	0	0	0	0	0	0	0	0	0	0	0	2
1	1	182	2	2	2	1	0	0	0	0	0	0	0	0	0	0	0	2
1	1	87	2	2	2	1	0	0	0	0	0	0	0	0	0	0	0	2
1	1	81	2	2	2	0	0	0	1	0	0	0	0	0	0	0	0	2
1	1	182	2	2	2	0	0	1	0	1	0	0	0	0	0	0	0	2
1	1	182	2	2	2	1	0	0	0	0	0	0	0	0	0	0	0	2
1	1	182	2	2	2	1	0	0	0	0	0	0	0	0	0	0	0	2
1	1	182	1	2	2	0	0	1	0	0	0	0	0	0	0	0	0	2
1	1	182	2	2	2	1	0	0	0	0	0	0	0	0	0	0	0	2
1	1	182	2	2	2	1	0	0	0	0	0	0	0	0	0	0	0	2
1	1	182	2	2	2	1	0	1	0	0	0	0	0	0	0	0	0	2
1	1	182	1	2	2	0	1	1	1	0	0	0	0	0	0	0	0	2
1	1	182	2	2	2	1	0	0	0	0	0	0	0	0	0	0	0	2
1	1	182	2	2	2	0	1	0	0	0	0	0	0	0	0	0	0	2
1	1	182	2	2	2	1	0	0	0	0	0	0	0	0	0	0	0	1
1	1	182	2	2	2	1	0	0	0	0	0	0	0	0	0	0	0	2
1	1	182	1	2	2	0	0	0	0	0	0	0	0	0	1	0	0	1
1	1	129	2	2	2	0	1	1	0	0	0	0	0	0	0	0	0	2
1	1	182	2	2	2	0	1	0	0	0	0	0	0	0	0	0	0	2
1	1	164	2	2	2	0	1	0	0	0	0	0	0	0	0	0	0	2
1	1	53	1	2	2	0	0	1	1	0	0	0	0	0	0	0	0	2
1	1	191	2	2	2	0	1	0	0	0	0	0	0	0	0	0	0	2
1	1	182	2	2	2	1	0	0	0	0	0	0	0	0	0	0	0	2
1	1	164	2	2	2	1	0	0	0	0	0	0	0	0	0	0	0	2
1	1	164	2	2	2	0	1	0	0	0	0	0	0	0	1	0	0	1
1	1	191	2	2	2	0	0	1	0	0	0	0	0	0	0	0	0	2
1	1	131	1	2	2	0	0	0	1	0	0	0	0	0	0	0	0	2
1	1	78	2	2	2	1	0	0	0	0	0	0	0	0	0	0	0	2
1	1	129	2	2	2	1	0	0	0	0	0	0	0	0	0	0	0	2
1	1	129	2	2	2	1	0	0	0	0	0	0	0	0	0	0	0	2
1	1	129	2	2	2	1	0	0	0	0	0	0	0	0	0	0	0	2
1	1	78	2	2	2	1	0	0	0	0	0	0	0	0	0	0	0	2
1	1	191	2	2	2	0	1	1	0	0	0	0	0	0	0	0	0	2
1	1	131	2	2	2	1	0	0	0	0	0	0	0	0	0	0	0	2
1	1	164	1	2	2	0	0	0	0	0	0	0	0	0	0	1	0	2
1	1	191	2	2	2	1	0	0	0	0	0	0	0	0	0	0	0	2
1	1	191	2	2	2	0	0	1	0	0	0	0	0	0	0	0	0	2
1	1	182	2	2	2	1	0	0	0	0	0	0	0	0	0	0	0	2
1	1	191	2	2	2	1	0	0	0	0	0	0	0	0	0	0	0	2
1	1	191	2	2	2	0	1	0	0	0	0	0	0	0	0	0	0	2
1	1	129	2	2	2	1	0	0	0	0	0	0	0	0	0	0	0	2
1	1	151	2	2	2	1	0	0	0	0	0	0	0	0	0	0	0	1
1	1	191	2	2	2	0	0	1	0	0	0	0	0	0	0	0	0	2
1	1	191	2	2	2	0	1	0	0	0	0	0	0	0	0	0	0	2
1	1	164	2	2	2	1	0	0	0	0	0	0	0	0	0	0	0	2
1	1	7	2	2	2	1	0	0	0	0	0	0	0	0	0	0	0	2
1	1	164	2	2	2	1	0	0	0	0	0	0	0	0	0	0	0	1
1	1	191	2	2	2	1	0	0	0	0	0	0	0	0	0	0	0	2
1	1	191	2	2	2	1	0	0	0	0	0	0	0	0	0	0	0	2
1	1	191	2	2	2	0	1	0	0	0	0	0	0	0	0	0	0	2
1	1	182	2	2	2	1	0	0	0	0	0	0	0	0	0	0	0	2
1	1	164	2	2	2	0	1	0	0	0	0	0	0	0	0	0	0	1
1	1	183	2	2	2	0	1	1	0	0	0	0	0	0	0	0	0	1
1	1	182	2	2	2	0	1	0	0	0	0	1	0	0	1	0	0	1
1	1	183	2	2	2	1	0	0	0	0	0	0	0	0	0	0	0	2
1	1	151	2	2	2	1	0	0	0	0	0	0	0	0	0	0	0	2
1	1	100	2	2	2	1	0	0	0	0	0	0	0	0	0	0	0	1
1	1	100	2	2	2	0	0	1	1	0	0	0	0	0	0	0	0	2
1	1	129	2	2	2	1	0	0	0	0	0	0	0	0	0	0	0	2
1	1	106	2	2	2	1	0	0	0	0	0	0	0	0	0	0	0	2
1	1	100	2	2	2	0	0	1	0	0	0	0	0	0	0	0	0	2
1	1	182	2	2	2	1	0	0	0	0	0	0	0	0	0	0	0	1
1	1	182	2	2	2	1	0	0	0	0	0	0	0	0	0	0	0	2
1	1	182	2	2	2	1	0	0	0	0	0	0	0	0	0	0	0	2
1	1	182	2	2	2	1	0	0	0	0	0	0	0	0	0	0	0	2
1	1	182	2	2	2	0	0	1	0	0	0	0	0	0	0	0	0	2
1	1	182	2	2	2	1	0	0	0	0	0	0	0	0	0	0	0	2
1	1	182	2	2	2	1	0	0	0	0	0	0	0	0	0	0	0	2
1	1	182	2	2	2	0	0	0	1	0	0	0	0	0	0	0	0	2
1	1	182	2	2	2	0	0	1	0	0	0	0	0	0	0	0	0	2
1	1	182	2	2	2	1	0	0	0	0	0	0	0	0	0	0	0	2
1	1	182	2	2	2	0	0	1	0	0	0	0	0	0	1	0	0	2
1	1	81	2	2	2	0	1	1	0	0	0	0	0	0	0	0	0	2
1	1	78	2	2	2	1	0	0	0	0	0	0	0	0	0	0	0	2
1	1	78	2	2	2	1	0	0	0	0	0	0	0	0	0	0	0	2
1	1	183	2	2	2	1	0	0	0	0	0	0	0	0	0	0	0	1
1	1	100	2	2	2	0	0	1	0	0	0	0	0	0	0	0	0	2
1	1	78	1	2	2	1	0	0	0	0	0	0	0	0	0	0	0	2
1	1	164	2	2	2	1	0	0	0	0	0	0	0	0	0	0	0	2
1	1	78	2	2	2	1	0	0	0	0	0	0	0	0	0	0	0	1
1	1	164	2	2	2	1	0	0	0	0	0	0	0	0	0	0	0	2
1	1	131	2	2	2	1	0	0	0	0	0	0	0	0	0	0	0	2
1	1	164	2	2	2	0	1	0	0	0	0	0	0	0	0	0	0	1
1	1	131	2	2	2	1	0	0	0	0	0	0	0	0	0	0	0	2
1	1	164	2	2	2	0	0	1	0	1	0	0	0	0	1	0	0	1
1	1	62	2	2	2	0	0	0	0	0	0	0	0	0	1	0	0	2
1	1	36	2	2	2	1	0	0	0	0	0	0	0	0	0	0	0	2
1	1	164	2	2	2	0	1	0	0	0	0	0	0	0	0	0	0	2
1	1	183	2	2	2	0	1	1	0	0	0	0	0	0	0	0	0	2
1	1	106	2	2	2	0	1	0	0	0	0	0	0	0	0	0	0	1
1	1	183	2	2	2	0	1	0	0	0	0	0	0	0	1	0	0	2
1	1	183	2	2	2	1	0	0	0	0	0	0	0	0	0	0	0	2
1	1	183	2	2	2	1	0	0	0	0	0	0	0	0	0	0	0	2
1	1	183	2	2	2	1	0	0	0	0	0	0	0	0	0	0	0	2
1	1	100	2	2	2	0	0	1	0	0	0	0	0	0	0	0	0	2
1	1	182	2	2	2	1	0	0	0	0	0	0	0	0	0	0	0	2
1	1	182	2	2	2	1	0	0	0	0	0	0	0	0	0	0	0	2
1	1	164	2	2	2	1	0	0	0	0	0	0	0	0	0	0	0	1
1	1	164	2	2	2	1	0	0	0	0	0	0	0	0	0	0	0	1
1	1	151	2	2	2	1	0	0	0	0	0	0	0	0	0	0	0	2
1	1	191	2	2	2	1	0	0	0	0	0	0	0	0	0	0	0	2
1	1	138	2	2	2	1	0	0	0	0	0	0	0	0	0	0	0	2
1	1	191	1	2	2	1	0	0	0	0	0	0	0	0	0	0	0	2
1	1	191	1	2	2	0	1	1	0	0	1	0	0	0	0	0	0	2
1	1	151	2	2	2	1	0	0	0	0	0	0	0	0	0	0	0	2
1	1	78	2	2	2	1	0	0	0	0	0	0	0	0	0	0	0	2
1	1	138	2	2	2	1	0	0	0	0	0	0	0	0	0	0	0	2
1	1	182	2	2	2	1	0	0	0	0	0	0	0	0	0	0	0	2
1	1	182	2	2	2	0	0	1	0	0	0	0	0	0	0	0	0	2
1	1	182	2	2	2	1	0	0	0	0	0	0	0	0	0	0	0	2
1	1	164	2	2	2	0	0	0	1	0	0	0	0	0	0	0	0	2
1	1	161	2	2	2	0	1	0	0	0	0	0	0	0	0	0	0	2
1	1	161	2	2	2	0	0	0	0	0	0	0	0	0	1	0	0	2
1	1	161	2	2	2	0	0	0	1	0	0	0	0	0	1	0	0	1
1	1	183	2	2	2	1	0	0	0	0	0	0	0	0	0	0	0	2
1	1	161	2	2	2	0	1	0	0	0	0	0	0	0	0	0	0	1
1	1	182	1	2	2	1	0	0	0	0	0	0	0	0	0	0	0	1
1	1	161	2	2	2	1	0	0	0	0	0	0	0	0	0	0	0	2
1	1	183	2	2	2	1	0	0	0	0	0	0	0	0	0	0	0	2
1	1	182	2	2	2	1	0	0	0	0	0	0	0	0	0	0	0	2
1	1	161	2	2	2	0	1	0	0	0	0	0	0	0	0	0	0	2
1	1	161	2	2	2	1	0	0	0	0	0	0	0	0	0	0	0	2
1	1	182	2	2	2	1	0	0	0	0	0	0	0	0	0	0	0	1
1	1	182	2	2	2	1	0	0	0	0	0	0	0	0	0	0	0	2
1	1	182	2	2	2	0	0	0	1	0	0	0	0	0	0	0	0	2
1	1	182	2	2	2	1	0	0	0	0	0	0	0	0	0	0	0	1
1	1	138	2	2	2	1	0	0	0	0	0	0	0	0	0	0	0	2
1	1	138	2	2	2	1	0	0	0	0	0	0	0	0	0	0	0	2
1	1	138	2	2	2	1	0	0	0	0	0	0	0	0	0	0	0	2
1	1	138	2	2	2	1	0	0	0	0	0	0	0	0	0	0	0	2
1	1	138	2	2	2	1	0	0	0	0	0	0	0	0	0	0	0	2
1	1	138	2	2	2	1	0	0	0	0	0	0	0	0	0	0	0	2
1	1	182	2	2	2	1	0	0	0	0	0	0	0	0	0	0	0	2
1	1	62	2	2	2	1	0	0	0	0	0	0	0	0	0	0	0	2
1	1	182	2	2	2	1	0	0	0	0	0	0	0	0	0	0	0	2
1	1	182	2	2	2	1	0	0	0	0	0	0	0	0	0	0	0	1
1	1	182	2	2	2	0	0	1	0	0	0	0	0	0	0	0	0	1
1	1	53	2	2	2	1	0	0	0	0	0	0	0	0	0	0	0	2
1	1	182	2	2	2	1	0	0	0	0	0	0	0	0	0	0	0	2
1	1	182	2	2	2	0	0	0	1	0	0	0	0	0	0	1	0	2
1	1	81	2	2	2	1	0	0	0	0	0	0	0	0	0	0	0	1
1	1	182	1	2	2	1	0	0	0	0	0	0	0	0	0	0	0	1
1	1	182	2	2	2	1	0	0	0	0	0	0	0	0	0	0	0	2
1	1	182	2	2	2	1	0	0	0	0	0	0	0	0	0	0	0	2
1	1	182	2	2	2	1	0	0	0	0	0	0	0	0	0	0	0	2
1	1	182	2	2	2	1	0	0	0	0	0	0	0	0	0	0	0	2
1	1	81	2	2	2	1	0	0	0	0	0	0	0	0	0	0	0	2
1	1	131	2	2	2	1	0	0	0	0	0	0	0	0	0	0	0	2
1	1	131	2	2	2	1	0	0	0	0	0	0	0	0	0	0	0	2
1	1	182	1	2	2	1	0	0	0	0	0	0	0	0	0	0	0	2
1	1	182	2	2	2	1	0	0	0	0	0	0	0	0	0	0	0	2
1	1	182	2	2	2	1	0	0	0	0	0	0	0	0	0	0	0	2
1	1	182	2	2	2	1	0	0	0	0	0	0	0	0	0	0	0	2
1	1	169	2	2	2	1	0	0	0	0	0	0	0	0	0	0	0	2
1	1	182	2	2	2	0	0	0	0	0	0	0	0	0	1	0	0	1
1	1	182	2	2	2	0	0	1	0	0	0	0	0	0	0	0	0	2
1	1	191	2	2	2	0	1	0	0	0	0	0	0	0	0	0	0	2
1	1	183	1	2	2	1	0	0	0	0	0	0	0	0	0	0	0	1
1	1	62	2	2	2	0	0	1	1	0	0	0	0	0	0	0	0	2
1	1	53	2	2	2	1	0	0	0	0	0	0	0	0	0	0	0	2
1	1	53	2	2	2	0	0	1	0	0	0	0	0	0	0	0	0	2
1	1	53	2	2	2	0	1	1	0	0	0	0	0	0	0	0	0	2
1	1	161	2	2	2	0	0	0	1	0	0	0	0	0	1	0	0	1
1	1	183	2	2	2	1	0	0	0	0	0	0	0	0	0	0	0	2
1	1	164	2	2	2	1	0	0	0	0	0	0	0	0	0	0	0	1
1	1	164	1	2	2	1	0	0	0	0	0	0	0	0	0	0	0	2
1	1	164	2	2	2	0	0	0	0	0	0	0	0	0	0	1	0	2
1	1	164	2	2	2	1	0	0	0	0	0	0	0	0	0	0	0	2
1	1	164	2	2	2	0	1	1	0	0	0	0	0	0	0	0	0	1
1	1	191	1	2	2	1	0	0	0	0	0	0	0	0	0	0	0	2
1	1	191	1	2	2	1	0	0	0	0	0	0	0	0	0	0	0	2
1	1	191	2	2	2	1	0	0	0	0	0	0	0	0	0	0	0	2
1	1	191	2	2	2	0	0	1	0	0	0	0	0	0	0	0	0	2
1	1	191	2	2	2	0	1	1	1	0	0	0	0	0	0	1	0	2
1	1	191	2	2	2	1	0	0	0	0	0	0	0	0	0	0	0	2
1	1	53	2	2	2	0	0	1	1	0	0	0	0	0	0	0	0	2
1	1	138	2	2	2	1	0	0	0	0	0	0	0	0	0	0	0	2
1	1	191	2	2	2	0	1	0	0	0	0	0	0	0	0	0	0	2
1	1	164	2	2	2	1	0	0	0	0	0	0	0	0	0	0	0	2
1	1	129	1	2	2	0	0	0	0	0	0	0	1	0	0	0	0	2
1	1	164	2	2	2	0	0	0	0	1	0	0	0	0	0	0	0	2
1	1	169	2	2	2	1	0	0	0	0	0	0	0	0	0	0	0	2
1	1	191	2	2	2	1	0	0	0	0	0	0	0	0	0	0	0	1
1	1	161	2	2	2	1	0	0	0	0	0	0	0	0	0	0	0	2
1	1	161	2	2	2	1	0	0	0	0	0	0	0	0	0	0	0	2
1	1	161	2	2	2	1	0	0	0	0	0	0	0	0	0	0	0	2
1	1	53	2	2	2	1	0	0	0	0	0	0	0	0	0	0	0	2
1	1	53	2	2	2	1	0	0	0	0	0	0	0	0	0	0	0	2
1	1	93	2	2	2	1	0	0	0	0	0	0	0	0	0	0	0	2
1	1	93	2	2	2	1	0	0	0	0	0	0	0	0	0	0	0	2
1	1	53	2	2	2	0	1	0	0	0	0	0	0	0	1	0	0	2
1	1	93	2	2	2	0	1	1	0	0	0	0	0	0	0	0	0	2
1	1	93	2	2	2	0	0	1	0	0	0	0	0	0	0	0	0	2
1	1	53	2	2	2	0	0	1	1	0	0	0	0	0	0	0	0	2
1	1	93	2	2	2	1	0	0	0	0	0	0	0	0	0	0	0	2
1	1	53	2	2	2	1	0	0	0	0	0	0	0	0	0	0	0	1
1	1	93	2	2	2	1	0	0	0	0	0	0	0	0	0	0	0	2
1	1	53	1	2	2	0	1	0	0	0	0	0	0	0	0	0	0	2
1	1	132	2	2	2	1	0	0	0	0	0	0	0	0	0	0	0	2
1	1	132	2	2	2	1	0	0	0	0	0	0	0	0	0	0	0	2
1	1	132	2	2	2	0	0	0	0	0	0	0	0	0	1	0	0	2
1	1	129	2	2	2	1	0	0	0	0	0	0	0	0	0	0	0	2
1	1	129	1	2	2	1	0	0	0	0	0	0	0	0	0	0	0	2
1	1	129	2	2	2	0	0	1	0	0	0	0	0	0	1	0	0	2
1	1	129	2	2	2	1	0	0	0	0	0	0	0	0	0	0	0	2
1	1	129	2	2	2	1	0	0	0	0	0	0	0	0	0	0	0	2
1	1	129	2	2	2	1	0	0	0	0	0	0	0	0	0	0	0	2
1	1	31	2	2	2	1	0	0	0	0	0	0	0	0	0	0	0	2
1	1	129	2	2	2	1	0	0	0	0	0	0	0	0	0	0	0	2
1	1	138	2	2	2	1	0	0	0	0	0	0	0	0	0	0	0	2
1	1	182	2	2	2	1	0	0	0	0	0	0	0	0	0	0	0	2
1	1	138	2	2	2	1	0	0	0	0	0	0	0	0	0	0	0	2
1	1	129	1	2	2	1	0	0	0	0	0	0	0	0	0	0	0	2
1	1	34	2	2	2	0	1	1	0	0	0	0	0	0	1	0	0	2
1	1	132	2	2	2	1	0	0	0	0	0	0	0	0	0	0	0	2
1	1	34	1	2	2	0	0	1	0	0	0	0	0	0	0	0	0	2
1	1	34	2	2	2	1	0	0	0	0	0	0	0	0	0	0	0	1
1	1	34	1	2	2	0	0	0	1	0	0	0	0	0	0	0	0	2
1	1	34	2	2	2	1	0	0	0	0	0	0	0	0	0	0	0	2
1	1	138	2	2	2	1	0	0	0	0	0	0	0	0	0	0	0	2
1	1	138	2	2	2	1	0	0	0	0	0	0	0	0	0	0	0	2
1	1	138	2	2	2	1	0	0	0	0	0	0	0	0	0	0	0	2
1	1	138	2	2	2	0	1	1	0	0	0	0	0	0	0	0	0	1
1	1	184	2	2	2	0	1	1	1	0	0	0	0	0	0	0	0	2
1	1	182	2	2	2	1	0	0	0	0	0	0	0	0	0	0	0	2
1	1	53	1	2	2	0	1	0	0	0	0	0	0	0	0	0	0	2
1	1	138	2	2	2	1	0	0	0	0	0	0	0	0	0	0	0	2
1	1	151	2	2	2	1	0	0	0	0	0	0	0	0	0	0	0	2
1	1	138	2	2	2	1	0	0	0	0	0	0	0	0	0	0	0	2
1	1	164	2	2	2	0	0	0	0	0	0	0	0	0	1	0	0	1
1	1	34	2	2	2	0	0	1	1	0	0	0	0	0	0	0	0	2
1	1	169	2	2	2	1	0	0	0	0	0	0	0	0	0	0	0	2
1	1	53	2	2	2	1	0	0	0	0	0	0	0	0	0	0	0	2
1	1	169	2	2	2	1	0	0	0	0	0	0	0	0	0	0	0	2
1	1	164	2	2	2	1	0	0	0	0	0	0	0	0	0	0	0	2
1	1	164	2	2	2	0	1	0	0	1	0	0	0	0	0	0	0	2
1	1	183	2	2	2	1	0	0	0	0	0	0	0	0	0	0	0	2
1	1	138	1	2	2	0	1	0	0	0	0	0	1	0	1	0	0	2
1	1	138	2	2	2	1	0	0	0	0	0	0	0	0	0	0	0	2
1	1	169	2	2	2	0	0	0	0	0	0	0	0	0	1	0	0	1
1	1	169	2	2	2	1	0	0	0	0	0	0	0	0	0	0	0	1
1	1	169	1	2	2	0	1	1	0	0	0	0	0	0	0	0	0	1
1	1	169	2	2	2	0	0	1	0	0	0	0	0	0	0	0	0	1
1	1	138	2	2	2	1	0	0	0	0	0	0	0	0	0	0	0	2
1	1	169	2	2	2	1	0	0	0	0	0	0	0	0	0	0	0	2
1	1	169	2	2	2	0	1	0	0	0	0	0	0	0	0	0	0	2
1	1	169	2	2	2	0	0	1	0	0	0	0	0	0	0	0	0	1
1	1	169	2	2	2	0	0	0	1	0	0	0	0	0	0	0	0	2
1	1	169	2	2	2	1	0	0	0	0	0	0	0	0	0	0	0	1
1	1	169	2	2	2	1	0	0	0	0	0	0	0	0	0	0	0	2
1	1	169	2	2	2	1	0	0	0	0	0	0	0	0	0	0	0	1
1	1	169	2	2	2	1	0	0	0	0	0	0	0	0	0	0	0	1
1	1	169	2	2	2	0	0	1	0	0	0	0	0	0	0	0	0	2
1	1	169	2	2	2	1	0	0	0	0	0	0	0	0	0	0	0	2
1	1	161	2	2	2	0	0	0	1	0	0	0	0	0	0	0	0	2
1	1	87	2	2	2	0	1	1	0	0	0	0	0	0	0	0	0	1
1	1	132	2	2	2	0	0	0	1	0	0	0	0	0	0	0	0	1
1	1	132	2	2	2	0	1	0	0	0	0	0	0	0	0	0	0	2
1	1	87	2	2	2	0	0	1	0	0	0	0	0	0	1	0	0	2
1	1	132	2	2	2	1	0	0	0	0	0	0	0	0	0	0	0	2
1	1	138	2	2	2	1	0	0	0	0	0	0	0	0	0	0	0	2
1	1	34	1	2	2	1	0	0	0	0	0	0	0	0	0	0	0	2
1	1	34	2	2	2	1	0	0	0	0	0	0	0	0	0	0	0	2
1	1	177	2	2	2	0	0	0	0	0	0	0	0	0	1	1	0	2
1	1	34	2	2	2	1	0	0	0	0	0	0	0	0	0	0	0	2
1	1	138	2	2	2	1	0	0	0	0	0	0	0	0	0	0	0	2
1	1	138	2	2	2	1	0	0	0	0	0	0	0	0	0	0	0	2
1	1	138	2	2	2	1	0	0	0	0	0	0	0	0	0	0	0	2
1	1	161	2	2	2	1	0	0	0	0	0	0	0	0	0	0	0	2
1	1	138	2	2	2	0	1	0	0	0	0	0	0	0	0	0	0	1
1	1	81	2	2	2	0	0	1	0	0	0	0	0	0	0	0	0	1
1	1	81	1	2	2	1	0	0	0	0	0	0	0	0	0	0	0	1
1	1	81	2	2	2	0	0	1	0	0	0	0	0	0	0	0	0	2
1	1	129	2	2	2	0	1	0	0	0	0	0	0	0	0	0	0	2
1	1	129	2	2	2	1	0	0	0	0	0	0	0	0	0	0	0	2
1	1	129	2	2	2	1	0	0	0	0	0	0	0	0	0	0	0	2
1	1	129	2	2	2	1	0	0	0	0	0	0	0	0	0	0	0	2
1	1	129	2	2	2	0	1	0	0	0	0	0	0	0	0	0	0	2
1	1	53	2	2	2	0	0	1	0	0	0	0	0	0	0	0	0	2
1	1	129	1	2	2	0	0	0	0	0	0	0	0	0	1	0	0	2
1	1	129	2	2	2	1	0	0	0	0	0	0	0	0	0	0	0	2
1	1	129	2	2	2	0	0	0	0	0	0	0	1	0	0	0	0	1
1	1	53	2	2	2	0	0	1	1	0	0	0	0	0	0	0	0	2
1	1	129	1	2	2	1	0	0	0	0	0	0	0	0	0	0	0	2
1	1	129	2	2	2	0	1	0	1	0	0	0	0	0	0	0	0	2
1	1	129	2	2	2	1	0	0	0	0	0	0	0	0	0	0	0	2
1	1	129	2	2	2	1	0	0	0	0	0	0	0	0	0	0	0	2
1	1	129	2	2	2	1	0	0	0	0	0	0	0	0	0	0	0	2
1	1	129	2	2	2	1	0	0	0	0	0	0	0	0	0	0	0	2
1	1	129	2	2	2	1	0	0	0	0	0	0	0	0	0	0	0	2
1	1	138	2	2	2	1	0	0	0	0	0	0	0	0	0	0	0	1
1	1	53	2	2	2	1	0	0	0	0	0	0	0	0	0	0	0	2
1	1	106	2	2	2	1	0	0	0	0	0	0	0	0	0	0	0	2
1	1	81	2	2	2	1	0	0	0	0	0	0	0	0	0	0	0	2
1	1	31	2	2	2	0	0	1	0	0	0	0	0	0	0	0	0	2
1	1	31	2	2	2	0	0	1	0	0	0	0	0	0	0	0	0	2
1	1	31	2	2	2	1	0	0	0	0	0	0	0	0	0	0	0	2
1	1	31	2	2	2	0	0	1	0	0	0	0	0	0	0	0	0	2
1	1	106	2	2	2	1	0	0	0	0	0	0	0	0	0	0	0	2
1	1	129	2	2	2	1	0	0	0	0	0	0	0	0	0	0	0	2
1	1	191	2	2	2	0	0	1	0	0	0	0	0	0	0	0	0	2
1	1	31	2	2	2	1	0	0	0	0	0	0	0	0	0	0	0	2
1	1	31	2	2	2	0	0	1	0	0	0	0	0	0	0	0	0	2
1	1	129	2	2	2	1	0	0	0	0	0	0	0	0	0	0	0	2
1	1	138	2	2	2	1	0	0	0	0	0	0	0	0	0	0	0	2
1	1	191	2	2	2	0	1	1	0	0	0	0	0	0	0	0	0	2
1	1	129	2	2	2	1	0	0	0	0	0	0	0	0	0	0	0	2
1	1	191	2	2	2	1	0	0	0	0	0	0	0	0	0	0	0	2
1	1	191	2	2	2	1	0	0	0	0	0	0	0	0	0	0	0	2
1	1	191	2	2	2	0	0	1	0	0	0	0	0	0	0	0	0	2
1	1	31	2	2	2	0	0	1	0	0	0	0	0	0	0	0	0	2
1	1	132	2	2	2	0	0	0	1	0	0	0	0	0	0	0	0	2
1	1	191	1	2	2	1	0	0	0	0	0	0	0	0	0	0	0	2
1	1	129	1	2	2	0	0	0	1	0	0	0	0	0	0	0	0	2
1	1	53	2	2	2	0	0	0	1	0	0	0	0	0	0	0	0	2
1	1	129	2	2	2	1	0	0	0	0	0	0	0	0	0	0	0	2
1	1	129	2	2	2	1	0	0	0	0	0	0	0	0	0	0	0	2
1	1	129	2	2	2	0	0	1	0	0	0	0	0	0	0	0	0	2
1	1	119	2	2	2	1	0	0	0	0	0	0	0	0	0	0	0	2
1	1	169	1	2	2	0	1	0	0	0	0	0	0	0	0	0	0	1
1	1	169	2	2	2	0	0	1	0	0	0	0	0	0	0	0	0	2
1	1	129	2	2	2	1	0	0	0	0	0	0	0	0	0	0	0	2
1	1	169	2	2	2	0	0	1	0	0	1	1	0	0	0	0	0	1
1	1	129	2	2	2	1	0	0	0	0	0	0	0	0	0	0	0	2
1	1	129	2	2	2	0	0	1	1	0	0	0	0	0	0	0	0	2
1	1	169	2	2	2	0	1	1	0	0	1	0	0	0	0	0	0	1
1	1	191	2	2	2	0	1	0	0	0	0	0	0	0	0	0	0	2
1	1	129	2	2	2	1	0	0	0	0	0	0	0	0	0	0	0	2
1	1	129	2	2	2	1	0	0	0	0	0	0	0	0	0	0	0	2
1	1	97	1	2	2	1	0	0	0	0	0	0	0	0	0	0	0	1
1	1	129	2	2	2	1	0	0	0	0	0	0	0	0	0	0	0	2
1	1	129	2	2	2	0	1	0	0	0	0	0	0	0	0	0	0	2
1	1	87	2	2	2	1	0	0	0	0	0	0	0	0	0	0	0	1
1	1	119	2	2	2	1	0	0	0	0	0	0	0	0	0	0	0	2
1	1	119	1	2	2	0	0	0	1	0	0	0	0	0	0	0	0	2
1	1	191	2	2	2	0	1	0	0	0	0	0	0	0	0	0	0	2
1	1	119	1	2	2	0	1	1	1	0	0	1	1	0	1	1	0	1
1	1	87	2	2	2	0	1	1	0	0	0	1	0	0	0	0	0	1
1	1	87	2	2	2	0	1	0	0	0	0	0	0	0	0	0	0	1
1	1	129	2	2	2	0	0	1	0	0	0	0	0	0	0	0	0	2
1	1	129	2	2	2	1	0	0	0	0	0	0	0	0	0	0	0	2
1	1	129	2	2	2	1	0	0	0	0	0	0	0	0	0	0	0	2
1	1	106	2	2	2	1	0	0	0	0	0	0	0	0	0	0	0	2
1	1	129	2	2	2	0	1	1	0	0	0	0	0	0	0	0	0	2
1	1	106	2	2	2	0	1	1	1	0	0	0	0	0	0	0	0	2
1	1	129	1	2	2	1	0	0	0	0	0	0	0	0	0	0	0	2
[truncated: 3,343 more rows]

## Sheet: Codes
Age	1	: 18-23
Sex	1	: Male
	2	: Female
Country (see next sheet)
Infected with COVID	1	: Yes
	2	: No
Suspected of COVID infection but not tested	1	: Yes
	2	: No
Do electronic cigarettes cause you any of the following conditions-non	0	: No
	1	: Yes
Do electronic cigarettes cause you any of the following conditions-teeth discoloration	0	: No
	1	: Yes
Do electronic cigarettes cause you any of the following conditions-caries	0	: No
	1	: Yes
Do electronic cigarettes cause you any of the following conditions-gum inflamation	0	: No
	1	: Yes
Do electronic cigarettes cause you any of the following conditions-White lesion	0	: No
	1	: Yes
Do electronic cigarettes cause you any of the following conditions-Hairy tongue	0	: No
	1	: Yes
Do electronic cigarettes cause you any of the following conditions-Taste alteration	0	: No
	1	: Yes
Do electronic cigarettes cause you any of the following conditions-Vomiting /Nause	0	: No
	1	: Yes
Do electronic cigarettes cause you any of the following conditions-Wound burns	0	: No
	1	: Yes
Do electronic cigarettes cause you any of the following conditions-Mouth dryness	0	: No
	1	: Yes
Do electronic cigarettes cause you any of the following conditions-Mouth airway irritatio	0	: No
	1	: Yes
Do electronic cigarettes cause you any of the following conditions-Cancer	0	: No
	1	: Yes
Smoking	1	: Yes
	2	: No

## Sheet: Country codes and label
Country
Codes	Label
3	Algeria
7	Argentina
9	Australia
13	Bahrain
17	Belgium
31	Canada
34	Chad
36	China
45	Cyprus
53	Egypt
60	France
62	Palestine
66	Germany
78	India
79	Indonesia
80	Iran
81	Iraq
82	Ireland
87	Jordan
93	Kuwait
97	Lebanon
100	Libya
106	Malaysia
111	Mauritania
119	Morocco
125	Holland
129	Nigeria
131	Oman
132	Pakistan
138	Philippines
141	Qatar
151	Saudi Arabia
161	South Africa
164	Sudan
167	Sweden
169	Syria
177	Turkey
181	Ukraine
182	United Arab Emirates
183	United Kingdom
184	United States of America
191	Yemen
